1

2

### 3 **Fork Pausing Complex Engages Topoisomerases at the Replisome**

4

5 Maksym Shyian<sup>\*</sup>, Benjamin Albert, Andreja Moset Zupan, Vitalii Ivanitsa, Gabriel Charbonnet, Daniel Dilg, and

6 David Shore<sup>\* $\alpha$</sup>

7 Department of Molecular Biology and Institute of Genetics and Genomics of Geneva (iGE3), University of

8 Geneva, Geneva 4, 1211 Switzerland

9

10 Running title: Replication fork sTOP model

11

12

13 <sup>\*</sup>Corresponding authors: [Maksym.Shyian@unige.ch](mailto:Maksym.Shyian@unige.ch); [David.Shore@unige.ch](mailto:David.Shore@unige.ch).

14  <sup>$\alpha$</sup> Lead contact

15

16

17 **ABSTRACT**

18 Replication forks temporarily or terminally pause at hundreds of hard-to-replicate regions around the  
19 genome. A conserved pair of budding yeast replisome components Tof1-Csm3 (fission yeast Swi1-Swi3 and  
20 human TIMELESS-TIPIN) acts as a ‘molecular brake’ and promotes fork slowdown at proteinaceous  
21 replication fork barriers (RFBs), while the accessory helicase Rrm3 assists the replisome in removing protein  
22 obstacles. Here we show that Tof1-Csm3 complex promotes fork pausing independently of Rrm3 helicase by  
23 recruiting topoisomerase I (Top1) to the replisome. Topoisomerase II (Top2) partially compensates for the  
24 pausing decrease in cells when Top1 is lost from the replisome. The C-terminus of Tof1 is specifically  
25 required for Top1 recruitment to the replisome and fork pausing but not for DNA replication checkpoint  
26 (DRC) activation. We propose that forks pause at proteinaceous RFBs through a ‘sTOP’ mechanism (‘slowing  
27 down with TOpoisomerases I-II’), which we show also contributes to protecting cells from topoisomerase-  
28 blocking agents.

29

30 **Keywords:** Tof1, Csm3, Mrc1, topoisomerase, Top1, Top2, RFB, replisome, replication fork pausing

31

## 32 INTRODUCTION

33           The chromosomal DNA of most cells is duplicated once per cell cycle due to the concerted action of  
34 DNA helicases unwinding the DNA template, topoisomerases unlinking the parental strands, and DNA  
35 polymerases synthesizing the daughter strands in collaboration with a myriad of accessory factors (Bell and  
36 Labib 2016). This assembly of proteins on the DNA replication fork is called the ‘replisome’. In order to  
37 achieve the completeness of genome duplication, the replisome should pass through the entirety of all  
38 chromosomes. On average budding yeast replisomes move through ca. 20 kb of DNA before merging with a  
39 converging fork (Pasero et al. 2002). However, *in vivo* the speed of the replisome is not uniform, as it  
40 temporarily or terminally slows/pauses/arrests/stalls at certain locations, called replication fork barriers  
41 (RFBs). RFBs are comprised by ‘unconventional’ DNA structures (inverted repeats, trinucleotide repeats, G4  
42 quadruplexes), RNA/DNA hybrids (R-loops), and tight protein/DNA complexes (Gadaleta and Noguchi 2017).  
43 Examples in yeast of the latter type of RFB are found at the rDNA repeat array, tRNA genes (tDNA),  
44 telomeres, centromeres, silent mating type loci (*HML/HMR*) silencer elements, and dormant origins of  
45 replication (Gadaleta and Noguchi 2017).

46           Replisome pausing at these protein barriers involves two components: (1) a tight DNA-binding  
47 protein block specific for a given locus (e.g. Fob1 (rDNA RFB - rRFB), the RNA polymerase III pre-initiation  
48 complex, the general regulatory factor Rap1, or the origin recognition complex) and (2) a “fork  
49 pausing/protection complex” (FPC) – the evolutionary conserved heterodimer represented by Tof1-Csm3 in  
50 budding yeast (Swi1-Swi3 in fission yeast and TIMELESS-TIPIN in human). Tof1-Csm3 is also found in  
51 association with Mrc1 (not itself involved in replication pausing) in a trimeric complex referred to as MTC,  
52 which travels with other factors in a still larger assembly on replication forks called the Replisome  
53 Progression Complex (RPC) (Gambus et al. 2006). Loss of Tof1-Csm3 leads to a decrease in replisome pausing  
54 at many of the studied protein barriers in budding and fission yeast, and human cells (Gadaleta and Noguchi

55 2017), while increasing blockage at some unconventional DNA structures (Voineagu et al. 2008). Accessory 5'  
56 to 3' DNA helicase Rrm3 is a part of the yeast replisome and uses its ATPase/helicase activity to assist the  
57 main replicative 3' to 5' CMG helicase (Cdc45-Mcm2-7-GINS) in progression specifically at the protein blocks  
58 (Ivessa et al. 2000; Ivessa et al. 2003; Azvolinsky et al. 2006). Replication fork stalling is proposed to fuel  
59 tumorigenesis and ageing (Gaillard et al. 2015). However, the molecular mechanism of action of the Tof1-  
60 Csm3, Rrm3 and replisome progression through protein blocks is complex and incompletely understood.

61 In addition to helicases, the replisome must employ topoisomerases in order to topologically unlink,  
62 or swivel, the two parental DNA strands (Duguet 1997). Topoisomerase I (Top1 in budding yeast) is regarded  
63 as the main replicative swivelase, while topoisomerase II (yeast Top2) provides a back-up mechanism when  
64 Top1 is not available (Kim and Wang 1989a; Bermejo et al. 2007). It was postulated that similarly to  
65 helicases, topoisomerase action should be impeded by the presence of tight protein complexes on DNA in  
66 front of the fork (Keszthelyi et al. 2016).

67 We set out here to understand the mechanism of Tof1-Csm3-dependent replisome arrest/pausing at  
68 RFBs. We show first that the Tof1-Csm3 fork pausing complex acts independently of the accessory helicase  
69 Rrm3. Instead, we find that Tof1-Csm3 engages replicative topoisomerase I (and backup topoisomerase II) at  
70 the replisome to promote fork pausing at proteinaceous RFBs (sTOP mechanism). The Tof1 C-terminus  
71 mediates Top1 association with the replisome and fork pausing but is not required for the DNA replication  
72 checkpoint (DRC). sTOP and DRC mechanisms jointly promote cellular resistance to topoisomerase-blocking  
73 agents.

74

## 75 RESULTS

### 76 ***Fork pausing complex Tof1-Csm3 acts independently of Rrm3 helicase***

77 Replication forks slow down at hundreds of tight protein/DNA complexes around the yeast genome  
78 (Gadaleta and Noguchi 2017). In search for the fork pausing mechanism, we started by first confirming with  
79 2D and 1D gels (Brewer and Fangman 1988; Kobayashi et al. 2004) that only Tof1-Csm3 but not Mrc1  
80 (Tourriere et al. 2005; Hodgson et al. 2007) or other related RPC components are required for fork pausing at  
81 the rRFB (**Fig. 1A, S1A-C**). Accessory helicase Rrm3 helps the replisome to move past protein RFBs  
82 throughout the genome (Ivessa et al. 2003). Upon initial characterization of the roles of Tof1 and Csm3 in  
83 fork pausing using 2D gels, it was postulated that they work by counteracting the Rrm3 helicase (**Fig. 1A,**  
84 model '1') (Mohanty et al. 2006; Bairwa et al. 2011). If this were true, fork pausing should become  
85 completely independent of Tof1-Csm3 in cells lacking Rrm3. However, closer inspection of the 2D gel  
86 evidence in the above initial reports suggests that this was not the case.

87 To clarify the Tof1-Csm3 relationship with Rrm3 we utilized several replication fork pausing and  
88 instability assays (**Fig. 1**). Deletion of *TOF1* or *CSM3* led to a strong decrease in paused fork signal at Fob1-  
89 RFB detected by 1D gels, as expected (**Fig. 1C**). Significantly, *tof1Δ* mutation also decreased fork pausing in a  
90 *rrm3Δ* background (**Fig. 1B, 1C**), suggesting that in cells lacking Rrm3 helicase, Tof1 still actively promotes  
91 replication fork slowdown (**Fig. 1A, model '2'**). Next, we used chromatin immunoprecipitation to probe  
92 binding of the replicative helicase components Mcm4 and Cdc45, as it was reported that replisome  
93 components are more enriched at pause sites (Azvolinsky et al. 2009). Consistent with the 1D and 2D gel  
94 analysis, we detected Tof1-dependent enrichment of Mcm4 and Cdc45 on several pause sites in cells lacking  
95 Rrm3 helicase (**Fig. 1D and S1D**), while pausing at telomeres was less dependent on Tof1.

96           Lack of the Rrm3 helicase leads to prolonged fork pausing at Fob1-RFB and elevated rDNA instability  
97 as a result of fork pausing (Ivessa et al. 2000). Utilizing *ADE2* marker loss from the rDNA locus as a measure  
98 of ribosomal gene array instability, we found that Tof1 was required for rDNA repeat destabilization in *rrm3Δ*  
99 cells (**Fig. 1E**). Remarkably, *tof1Δ* mutation also suppressed the more elevated instability of an *rrm3Δ rif1Δ*  
100 double mutant, which additionally lacks a negative regulator of replication origin firing, Rif1 (Shyian et al.  
101 2016). Viability of *rif1Δ* cells requires the DSB repair and fork maintenance complex MRX, and the lethality  
102 caused by MRX mutations in these cells is suppressed by pausing alleviation through *fob1Δ*, *tof1Δ*, or *csm3Δ*  
103 mutations (Shyian et al. 2016). Notably, we observed that *tof1Δ* partially suppressed synthetic sickness of  
104 *rrm3Δ* and *mre11Δ* mutations, to an extent slightly stronger than suppression by *fob1Δ* (**Fig. 1F**). This  
105 difference in suppression by *tof1Δ* compared to *fob1Δ* is perhaps related to a more general role of Tof1 in  
106 replisome pausing throughout the genome, since Fob1 is thought to act exclusively at rDNA repeats.  
107 Altogether, our results show that Tof1 mediates fork pausing, rDNA instability and cellular toxicity in cells  
108 lacking Rrm3 helicase. Therefore, it is unlikely that Tof1 promotes fork pausing exclusively by regulating  
109 Rrm3 helicase but rather suggests a more direct involvement of Tof1-Csm3 in fork slowdown (**Fig. 1A**, model  
110 '2'), albeit through an unknown mechanism.

### 111 ***Tof1-Csm3 complex interacts with Top1***

112           Intrigued by the strong rDNA stabilizing effect of *tof1Δ* mutation (**Fig. 1E**), we sought to identify the  
113 factor(s) contributing to this stability and regulating replication fork pausing at Fob1-RFB. We carried out an  
114 unbiased forward genetic screen for mutants de-stabilizing the rDNA in either a wild type (WT) or *tof1Δ*  
115 background, using *ADE2* and *URA3* loss from the array as a read-out (the “cowcatcher” screen, Materials and  
116 Methods; **Fig. S2A**). Mutations in *RRM3*, *SIR2*, *HST3*, *CAC1*, *ORC1* and *PSF2* genes were recovered in the WT  
117 background but not in *tof1Δ*. One of the mutations we discovered specifically in the *tof1Δ* background was in

118 the *TOP1* gene, which encodes topoisomerase I (**Fig. S2A**) – an enzyme required for both DNA replication and  
119 stability of rDNA repeats (Christman et al. 1988; Kim and Wang 1989b; Kim and Wang 1989a). The highly  
120 negative score of this *top1-G297D* mutation in Protein Variation Effect Analyzer (Choi et al. 2012) (PROVEAN:  
121 -7; cutoff = -2.5) implied a deleterious effect of this change on Top1 function. Indeed, complete deletion of  
122 the *TOP1* ORF led to a strong elevation of rDNA instability (**Fig. 2A**). In contrast to *rrm3Δ* and *rif1Δ* mutations  
123 however, the rDNA instability in *top1Δ* cells was not suppressed by *tof1Δ*, suggesting that Top1 and Tof1 may  
124 have overlapping roles. This and the fact that *TOF1* was originally identified in a yeast two-hybrid screen that  
125 employed a part of Top1 protein as a bait, as its name implies ('TOpoisomerase I-interacting Factor 1'; (Park  
126 and Sternglanz 1999)), prompted us to focus further on this factor.

127 As mentioned above, Tof1-Csm3 is present in the cell nucleus within the MTC complex, together with  
128 Mrc1 (Bando et al. 2009). Using co-immunoprecipitation experiments, we observed that topoisomerase I  
129 was indeed recovered together with all the three components of the MTC complex (**Fig. 2B, S2B**). This  
130 interaction was detected only when whole cell extracts were treated with Benzonase nuclease, which  
131 degrades nucleic acids and liberates protein complexes from chromatin (De Piccoli et al. 2012) (**Fig. S2C**).  
132 Importantly, the MTC-Top1 interaction depended only on Tof1 and Csm3 proteins, but not Mrc1 (**Fig. 2B,**  
133 **S2B**), suggesting that Mrc1 interacts with Top1 indirectly through a Tof1-Csm3 sub-complex.

#### 134 ***Tof1-Csm3 promotes Top1 recruitment to the replisome***

135 Since both Tof1-Csm3 and Top1 are components of the RPC (Gambus et al. 2006) we wondered  
136 whether the interaction of Tof1-Csm3 with Top1 occurs in the context of the replisome, which might explain  
137 how Top1 is recruited to the replication fork. To investigate this possibility, we conducted chromatin  
138 immunoprecipitation (ChIP) experiments to assess Top1 recruitment to origins of replication in cell cultures  
139 synchronously released into S phase from  $\alpha$ -factor induced G1 arrest. We detected Top1 association with

140 early origins (*ARS305* and *ARS607*) at the time of their activation (**Fig. 2C** and **S2D**) in accordance with a  
141 previous study (Bermejo et al. 2007). However, cells lacking Tof1 had much lower levels of Top1 recruitment  
142 to these (**Fig. 2C** and **S2D**). To confirm this result, we analyzed the genome wide binding of Top1 in early S  
143 phase and observed, as expected, that Top1 is enriched at replicating ARSs (**Fig. 2D**) and highly transcribed  
144 genes (**Fig. S2E**) that correspond to regions experiencing high helical tension. Remarkably, removing Tof1  
145 abolished the Top1 signal at ARSs, whereas binding at promoters of highly transcribed genes was not  
146 affected. Furthermore, absence of the MTC complex member Mrc1 did not affect Top1 recruitment (**Fig. 2C**  
147 and **S2D**), which is in line with retention of the Tof1-Top1 interaction in *mrc1Δ* cells (**Fig. 2B** and **S2B**).  
148 Moreover, absence of the Rrm3 helicase did not restore the Top1 association with origins in *tof1Δ* cells (**Fig.**  
149 **2C** and **S2D**).

150 The last 258 amino acid residues of the C-terminal part of Tof1 were reported to be sufficient for the  
151 two-hybrid interaction with Top1 (Park and Sternglanz 1999). Consistent with this part of Tof1 harboring a  
152 Top1-interacting domain, we observed a loss of Top1 co-immunoprecipitation and recruitment to origins in  
153 cells expressing a Tof1 protein lacking the last 258 aa (*tof1-ΔC* = *tof1-Δ<sup>981-1238</sup>-3xFLAG*) (**Fig. 2E-F** and **S2F-G**).  
154 Importantly, recruitment of WT Tof1 and the truncated Tof1-ΔC protein to origins was comparable (**Fig. 2F**  
155 and **S2F-G**). This suggests that Tof1 promotes Top1 association with origins by directly recruiting Top1 to the  
156 replisome.

### 157 ***Top1 positively regulates replication fork pausing at RFBs***

158 As it is not understood how Tof1-Csm3 slows down the replication fork at protein barriers, we  
159 wondered if their interactor Top1 is involved in this process. In order to assess this putative functional link  
160 between Tof1 and topoisomerase I, we evaluated replication pausing at RFBs in asynchronous cultures.  
161 Indeed, deletion of *TOP1* or dissociation of Top1 from the replisome by *tof1-ΔC* mutation led to a similar ca.



162 50% decrease in pausing at RFBs both in WT and *rrm3Δ* backgrounds, as detected by 2D and 1D gels at rRFB  
163 (**Fig. 3A** and **S3A-B**) or by Mcm4-MYC CHIP at rRFB and tRNA genes (**Fig. 3B** and **S3C**). Moreover, the fork  
164 pausing decrease in the double mutant *tof1-ΔC top1Δ* was comparable to that of single *tof1-ΔC* and *top1Δ*  
165 mutants (**Fig. 3B**), suggesting that the two factors could act in the same pausing pathway. Consistent with  
166 retention of Top1 recruitment to the FPC complex and to the replisome, *mrc1Δ* had no defect in pausing (**Fig.**  
167 **S3B**), as previously shown (Tourriere et al. 2005; Hodgson et al. 2007). Moreover, as the *mrc1Δ* mutation is  
168 known to decrease fork progression rates even more strongly than does *tof1Δ*, but has no effect on pausing  
169 (Tourriere et al. 2005; Hodgson et al. 2007), it seems unlikely that the decreased fork pausing in *tof1-ΔC* or  
170 *top1Δ* mutant could be an indirect consequence of any potential change in fork progression rates in these  
171 mutants.

172 We had shown previously (Shyian et al. 2016) that *rif1Δ* leads to increased initiation at the rDNA ARS  
173 elements. One consequence of this is increased fork stalling and collapse at the rRFB, which leads to  
174 synthetic sickness in combination with *mre11Δ*. This synthetic growth defect is abolished by deletion of  
175 *FOB1*, confirming its connection to the rDNA fork block. As expected for a pausing defect, we found that  
176 *tof1-ΔC* partially alleviated *rif1Δ mre11Δ* synthetic sickness (**Fig. 3C**).

177 The fact that cells lacking Top1 completely or lacking the Top1-recruiting C-terminus of Top1 still  
178 exhibit a pause signal significantly higher than cells lacking the whole of Top1 protein (**Fig. 3A**) suggests that  
179 some other factor(s) are able to compensate for Top1 loss in a Top1-dependent way and slow down the  
180 replisome in the absence of Top1.

181 ***Top1 and Top2 redundantly promote fork pausing at Fob1-RFB***

182 Top1 is believed to be the main replicative swivelase (Kim and Wang 1989a), but it is not essential for  
183 replication elongation and survival in budding yeast since Top2 is able to compensate for its absence (Kim  
184 and Wang 1989a; Bermejo et al. 2007). Consistent with this, we also detected Top2 in the  
185 immunoprecipitates of Top1 and Csm3 proteins (**Fig. S4A**) and *tof1-ΔC* mutation only partially affected this  
186 association (**Fig. S4B**). We asked then whether Top2 could compensate for the loss of the Top1 in the  
187 replication fork pausing. Indeed, while inactivation of topoisomerase II at elevated temperature in a *top2-ts*  
188 strain or by auxin-induced degradation of the protein had only a little effect on pausing (**Fig. 4A-B** and **S4C-D**)  
189 doing so in cells lacking Top1 (*top1Δ*) or in cells with Top1 destabilized from the replisome (*tof1-ΔC*) led to a  
190 dramatic fork pausing loss phenotype similar to the one in *tof1Δ* cells (**Fig. 4A-B, S4C-D** and **S4F-G**).

191 We observed a similar loss of fork slowdown when using different means to simultaneously deplete  
192 Top1 and Top2: temperature inactivation of Top2 in *top1Δ top2-ts* and *tof1-ΔC top2-ts* strains (**Fig. 4A-B** and  
193 **S4C**), degradation of both proteins (Top1-AID and Top2-AID) or degradation of Top2 in *top1Δ* and/or *tof1-ΔC*  
194 cells by the auxin-induced degron (Morawska and Ulrich 2013) system (**Fig. S4D-G**) and anchoring away  
195 (Haruki et al. 2008) of Top2 in a *top1Δ TOP2-FRB* background (**Fig. S4H**). Depletion of Top3 on its own or in  
196 combination with either Top1 or Top2 did not abolish the block (**Fig. S4D**), in accord with a recent study  
197 (Mundbjerg et al. 2015) and consistent with Top3 having a role in recombination but not replication  
198 (Pommier et al. 2016). Remarkably, replication intermediates in cells lacking both Top1 and Top2 had an  
199 appearance very similar to those of *tof1Δ* strains (**Fig. 3A, 4A**, and **S4C-H**), in which the loss of the pausing  
200 signal at the Fob1-RFB was accompanied by an increase in the intensity of the descending part (left half) of  
201 the Y arc. We speculate that the latter might be due to a head-on collision of the replication fork liberated  
202 from Fob1-RFB with the RNA polymerase I transcribing the adjacent rRNA gene. Thus, Top1 and Top2

203 proteins act in parallel to promote replication fork pausing at Fob1-RFB, and the replisome appears to be able  
204 to move past the Fob1-RFB in their absence.

205 Nevertheless, these data have to be interpreted with caution since it was reported that simultaneous  
206 inactivation of topoisomerase I and II leads to DNA damage checkpoint activation and to rapid replication  
207 cessation (Bermejo et al. 2007), which could in theory contribute to the observed fork pausing phenotypes.  
208 However, addressing the checkpoint issue, we found that degradation of both Top1 and Top2 in the  
209 checkpoint-deficient backgrounds *rad53-K227A* (kinase-dead Rad53) or *rad9Δ* abolished pausing to an extent  
210 similar to that in checkpoint-proficient cells (**Fig. S4H**), indicating that checkpoint activation is not necessary  
211 for the loss of replication fork slowdown. With regard to replication cessation, when released from G1 arrest  
212 into S phase at +37 °C, *top1Δ top2-ts* strains indeed failed to progress through S phase and arrested with  
213 close to 1C DNA content (**Fig. 4C**), consistent with previous findings (Kim and Wang 1989a; Bermejo et al.  
214 2007). However, *tof1-ΔC top2-ts* and *tof1Δ top2-ts* cells rapidly progressed through the S phase in these  
215 conditions (similarly to *top2-ts* only cells (**Fig. 4C and S4E**)). Since both *top1Δ top2-ts* and *tof1-ΔC top2-ts*  
216 cells show a similar decrease of fork pausing at +37 °C (**Fig. 4A-B, S4C-D**), while only the former exhibits an S  
217 phase progression defect, we reasoned that the fork slowdown by Top1 and Top2 is not an indirect  
218 consequence of their genome-wide replication role but rather an *in cis* effect of these topoisomerases at the  
219 replisome, promoted by the Tof1-Csm3 complex. Moreover, it appears that Top1 (and perhaps Top2)  
220 anchoring at the replisome by Tof1 is not essential for the general S phase progression but is specifically  
221 important for fork pausing.

222 ***tof1-ΔC is a separation of function mutation that leaves replication checkpoint roles intact***

223           Since Tof1-Csm3 is an evolutionary conserved complex performing both fork pausing and replication  
224 checkpoint functions at the replisome (McFarlane et al. 2010), we wondered if the Tof1 C-terminus might be  
225 specifically involved in only the fork pausing role.

226           First, similar to the wild-type version, Tof1-ΔC protein appears to protect its partner Csm3 from  
227 degradation (**Fig. 5A**), an evolutionarily-conserved Tof1 function (Chou and Elledge 2006; Bando et al. 2009).  
228 Next, Tof1 positively regulates the DNA replication checkpoint (DRC) (Foss 2001), promoting survival of DNA  
229 damage response-deficient cells (*rad9Δ*) subjected to hydroxyurea-induced replication stress. Tof1-ΔC was  
230 still able to carry out this function (**Fig. 5B**), indicating that it is likely checkpoint-proficient. Accordingly, Tof1-  
231 ΔC supported DRC activation as measured by Rad53 phosphorylation in both *rad9Δ* and in WT cells (**Fig. 5C**  
232 and **5B**), while *tof1Δ rad9Δ* cells had a prominent defect in Rad53 phosphorylation similar to checkpoint  
233 defective *mec1Δ sml1Δ* cells, as expected (Foss 2001). Furthermore, Tof1 and Mrc1 appear to act in the same  
234 DRC pathway, as *tof1Δ* and *tof1Δ mrc1Δ* cells showed a similar defect in Rad53 phosphorylation under HU  
235 treatment (**Fig. 5D**), consistent with known role of the Tof1 in promoting Mrc1 association with replication  
236 forks (Bando et al. 2009).

237           The loss of Tof1-Csm3 complex, but not Mrc1, confers strong sensitivity to the Top1-trapping agent  
238 camptothecin (CPT) (Redon et al. 2006; Reid et al. 2011) (**Fig. 5E** and **S5A-B**). We found in addition that cells  
239 lacking any of the MTC complex components display impaired growth in the presence of etoposide (ETOP)  
240 (**Fig. 5E** and **S5A-B**), a chemical blocking topoisomerase II, with *tof1Δ* and *csm3Δ* again having a greater effect  
241 than *mrc1Δ*. Importantly, *tof1Δ* and *csm3Δ* mutations impaired growth specifically in the presence of  
242 topoisomerase blocking agents but not upon DNA double-strand break induction by phleomycin or fork  
243 stalling and breakage by the alkylating agent MMS (**Fig. S5A-B**). Therefore, the Tof1-Csm3 complex appears

244 to protect cells from blocked topoisomerases. We wondered whether this protection stems from the ability  
245 of Tof1-Csm3 to engage with Top1 and Top2. Surprisingly, *tof1-ΔC* mutant was still significantly resistant to  
246 CPT and ETOP (**Fig. 5E**). We reasoned that the higher sensitivity of *tof1Δ* to these agents in contrast to *tof1-*  
247 *ΔC* mutant could be due to the preservation of another function in the Tof1-ΔC protein and, since Tof1-ΔC is  
248 proficient in the Mrc1-dependent DRC (**Fig. 5C** and **4D**), speculated that this might also be related to a role  
249 shared with Mrc1. We therefore removed Mrc1 from the *tof1-ΔC* mutant cells and indeed observed an  
250 increase in CPT and ETOP sensitivity in the *tof1-ΔC mrc1Δ* double mutant, to an extent comparable to that of  
251 *tof1Δ* cells (**Fig. 5E**). Interestingly, *tof1Δ*, but not *tof1-ΔC*, grew slowly in combination with *mrc1Δ* (at 25°C;  
252 **Fig. 5E**) and in spore colonies, suggesting that Tof1-ΔC protein still performs an additional function important  
253 for growth in parallel to Mrc1. Thus, the Tof1-Csm3 complex appears to protect the cell from trapped  
254 topoisomerases by both interacting with them directly (through the C-terminus of Tof1, and perhaps other  
255 regions) and by acting together with Mrc1, likely by promoting the DRC and/or stabilizing forks at the  
256 topoisomerase-trapping sites (Strumberg et al. 2000).

## 257 **DISCUSSION**

258 In summary, we showed that Tof1-Csm3 mediates replication fork pausing at proteinaceous RFBs  
259 through a pathway independent of Rrm3 helicase. Instead, Tof1-Csm3 complex interacts with  
260 topoisomerases I and II and mediates Top1 association with the replisome in normal S phase. Although we  
261 did not detect Top2 recruitment to replisomes in unchallenged cells with ChIP, alternative approaches should  
262 be used in the future to assess Top2 recruitment and its dependency on FPC. Top1 was previously identified  
263 as a part of the RPC (Gambus et al. 2006) and our report pinpoints the precise factor responsible for its  
264 engagement and suggests that eukaryotic cells do not rely exclusively on the DNA topology-mediated  
265 recruitment of topoisomerases to replicate chromosomes but rather have an association hub (Tof1-Csm3) to  
266 enrich them on the replisome. We imagine that this pathway could serve to prevent buildup of excess

267 torsional stress in the vicinity of the replisome, by ensuring topoisomerase presence. This may avert  
268 uncontrolled escape of supercoils away from the fork by diffusion, supercoil ‘hopping’ (van Loenhout et al.  
269 2012) or fork rotation (Schalbetter et al. 2015), possibilities that warrant further investigation.

270 Our findings indicate that either Top1 or Top2 is able to impose replication fork pausing at the Fob1-  
271 RFB, through a mechanism that we dub ‘sTOP’ (‘slowing down with TOPoisomerase I and II’) (**Fig. 6**). Indeed,  
272 it is assumed that in eukaryotes topoisomerase I and II act in front of the replication fork to unlink the  
273 parental DNA strands (Brill et al. 1987; Duguet 1997), while topoisomerase II acts also behind the fork to  
274 remove precatenanes. Either Top1 or Top2 is sufficient to assist in DNA replication elongation (Pommier et  
275 al. 2016), explaining why *TOP1* is not essential. The essential role of *TOP2* stems not from the replication  
276 elongation step, but from its crucial role in chromosome segregation during replication termination (Baxter  
277 and Diffley 2008). We imagine that the local increase in topoisomerase concentration/activity in the vicinity  
278 of replisome afforded by Tof1-Csm3 recruitment might assist general replication elongation by alleviating  
279 torsional stress. In cells lacking the Tof1-Csm3 complex topoisomerases would act more distributively but  
280 still ensure replisome progression, albeit perhaps less efficiently. We note that recruitment of an essential  
281 enzymatic function to the replisome by non-essential RPC factors is not unprecedented, since another RPC  
282 component, Ctf4, serves to recruit DNA polymerase  $\alpha$ /primase (Simon et al. 2014) and Mrc1 stimulates the  
283 interaction of the leading strand DNA polymerase  $\epsilon$  (Lou et al. 2008).

284 In order to assist in DNA replication, the topoisomerase swivelase should be placed in front of the  
285 replication fork (Duguet 1997) – a setting where Top1 and Top2 might be the first replisome components to  
286 encounter obstacles. The slowing of the replication fork could be either a consequence of an inhibitory signal  
287 propagating from stalled topoisomerases through Tof1-Csm3 to the CMG helicase, or a result of  
288 topoisomerase activity itself. Consistent with first mode of action, it was reported that Tof1-Csm3  
289 orthologues are able to inhibit the ATPase activity of MCM proteins *in vitro* (Cho et al. 2013). According to

290 the second model, the absence of Top1 and Top2 at the replisome might promote bypass of barriers by  
291 increasing superhelical tension at the fork and simplifying blocking protein dissociation from DNA. In line  
292 with this possibility, bacterial *topA* mutants cause a loss of replication fork pausing at Tus/Ter sites likely by  
293 an increase in negative superhelicity, as this is suppressed by compensatory *gyrB* mutations (Valjavec-Gratian  
294 et al. 2005). Moreover, it was proposed that topoisomerase inhibition leads to nucleosome destabilization  
295 due to increased positive torsion ahead of transcribing RNA polymerase II (Teves and Henikoff 2014). It is  
296 thus tempting to speculate that by recruiting topoisomerases to the fork, Tof1-Csm3 precludes torsional  
297 stress buildup ahead of the replisome, helping to maintain integrity of chromatin (binding of both non-  
298 histone and histone proteins). Further studies, particularly with single-molecule approaches, will help to  
299 assess whether this is the case and elucidate the exact molecular details of how Top1 and Top2 promote the  
300 replication fork pausing at proteinaceous barriers and general fork progression.

301           Although topoisomerase would still be expected to assist DNA elongation by replisomes lacking the  
302 Tof1-Csm3 complex (since *tof1Δ* and *csm3Δ* cells are viable), the failure to recognize topoisomerases in front  
303 of the fork, and perhaps to duly pause until they dissociate from the template, might lead to replisome-  
304 topoisomerase collisions. We speculate that collision and replication run-off (Strumberg et al. 2000) with  
305 subsequent failure to properly activate checkpoint and repair the collapsed forks might explain the elevated  
306 sensitivity of *tof1Δ* and *csm3Δ* mutants to topoisomerase blocking conditions (**Fig. 5D, S5A-B**) (Redon et al.  
307 2006; Reid et al. 2011). Accordingly, it was recently proposed that the Csm3 orthologue TIPIN may help to  
308 recognize topoisomerase I trapped by CPT and preclude replisome collision with it (Hosono et al. 2014).

309           This novel replication fork ‘STOP’ mechanism offers a solution to an unresolved problem of how  
310 Tof1-Csm3 manages to recognize molecularly distinct RFBs: the Top1 and Top2 topological (or physical)  
311 interaction with RFBs might serve as a unifying common feature of different barriers. We also note that  
312 catalytically engaged Top1 is present at the Fob1-RFB (due to an interaction with Tof2 (Krawczyk et al. 2014))

313 throughout the cell cycle (Di Felice et al. 2005) and Top1 assists in progression of RNA polymerase II  
314 complexes (Teves and Henikoff 2014; Baranello et al. 2016). Therefore, an intriguing question would be  
315 whether Tof1-Csm3 could mediate recognition by the replisome of Top1 and Top2 present as a part of these  
316 and other chromatin complexes in the path of a replication fork.

317           Recently DNA replication elongation reactions (Yeeles et al. 2017) and fork pausing at Fob1 barriers  
318 were successfully reconstituted *in vitro* (Hizume et al. 2018), where Tof1-Csm3 supported high elongation  
319 rates and mediated pausing. It will be of interest to test whether these *in vitro* phenotypes of Tof1-Csm3 are  
320 mediated via recruitment of Top1 and Top2 to the replisome. Another fascinating question is whether the  
321 role of Tof1-Csm3 orthologues in other systems, such as replication pausing and imprinting control by Swi1-  
322 Swi3 at the *mat* locus in fission yeast (Dalgaard and Klar 2000), circadian clock regulation in metazoans  
323 (McFarlane et al. 2010), and survival in the face of replication stress (Bianco et al. 2019) are mediated via  
324 interactions with topoisomerases.

325

## 326 **Materials and Methods**

### 327 ***Yeast strains, genetics and growth conditions***

328 Standard genetic methods for budding yeast strain construction and crossing were used (Shyian et al. 2016).  
329 Strains used in this study are listed in the **Table S1**. Genotoxic agent sensitivity was assessed in multidrug-  
330 sensitive yeast background (Chinen et al. 2011). For growth assays, saturated cultures of the respective  
331 genotypes were serially diluted (1:10) and spotted onto YPAD plates or YPAD plates supplemented with  
332 genotoxic agents. The plates were imaged following 2-4 days of incubation at 30°C or 25°C. *ADE2* marker  
333 loss assays were performed essentially as in (Shyian et al. 2016). Degradation of AID-tagged proteins



334 (Morawska and Ulrich 2013) and cytoplasmic anchoring of the FRB-tagged proteins (Haruki et al. 2008) was  
335 achieved by addition of 1 mM IAA (Indole-3-acetic acid) or 1 mkg/mL RAPA (Rapamycin) for 60 minutes to  
336 the exponentially growing cultures. Heat inactivation of the Top2-ts protein was achieved by shifting  
337 exponentially growing yeast cultures from +25°C to +37°C for 60 minutes. For the cell cycle progression  
338 analysis in *top2-ts* background, the exponentially growing cells were arrested in G1 with  $\alpha$ F treatment at  
339 +25°C during 2.5 hrs, transferred to +37°C for an additional 1 hr, washed 2x times with H<sub>2</sub>O, and released  
340 from the G1 arrest at +37°C in pronase-containing medium (Mattarocci et al. 2014).

#### 341 ***rDNA instability (ADE2 loss) assay***

342 rDNA instability was assessed by the *ADE2* marker loss assay (Kaeberlein et al. 1999; Shyian et al. 2016).  
343 Saturated yeast cultures were diluted in water to around 400 cells per volume and plated onto YPD plates  
344 supplemented with 5 mg/ml adenine or onto SC plates (with or without 5-FOA). Plates were incubated at  
345 30°C for 3 days, then at 4°C during 2 days and subsequently at 25°C for 1 day. The colonies were counted  
346 using ImageJ software Colony Counter plugin and the marker loss was plotted as the percentage of white  
347 colonies having red sectors to all the colonies except completely red colonies (where *ADE2* marker was lost in  
348 previous cell divisions).

#### 349 ***1D and 2D gels and Southern blot***

350 2D gels were performed essentially as in (Shyian et al. 2016) using BglII enzyme for genomic DNA digestion  
351 and Fob1-RFB Southern blot hybridization probe. The images were acquired with Typhoon FLA 9500 (GE  
352 Healthcare Life Sciences) and the intensity of signals quantified with ImageQuant TL 8.1 Software (GE  
353 Healthcare Life Sciences). The ratio of the signals at the rRFB spot to the remainder of Y arc of a given  
354 mutant was normalized to the respective ratio in WT present on the same 2D gel membrane and reported as

355 'Replication forks at RFB relative to *Y arc*' value; this value in all the WT samples therefore equals 1. For 1D  
356 gels the first dimension gel was stained with EtBr, directly transferred to nylon membrane and probed with a  
357 radioactively labeled probe specific to Fob1-RFB site (Brewer and Fangman 1988; Kobayashi et al. 2004). The  
358 membranes were exposed to K-screens (Bio-Rad) for 6 hrs to 7 days before phosphorimaging.

### 359 **Chromatin Immunoprecipitation (ChIP)**

360 Mcm4-13MYC, Cdc45-13MYC, Top1-13MYC anti-Myc and Tof1-3FLAG, Tof1-980aa-3FLAG anti-FLAG ChIP  
361 assays were performed essentially as in (Mattarocci et al. 2014). Mcm4-13MYC and Cdc45-13MYC ChIP  
362 experiments were done using asynchronously growing cultures. Where indicated, precipitated DNA was used  
363 to prepare sequencing libraries with TruSeq (illumine) and sequenced on iGE3 Genomics Platform of  
364 University of Geneva. FASTQ files were mapped to *S. cerevisiae* genome with Mapping tool of 'HTSstation'  
365 (David et al. 2014). Cell synchronization and flow cytometry assays were performed essentially as described  
366 in (Mattarocci et al. 2014).

### 367 **'Cowcatcher' screen**

368 Strains containing single copy of *ADE2* and *URA3* genes inserted into rDNA array were used for mutagenesis  
369 with EMS at 50% survival. EMS-treated cultures were split in 10 separate tubes, inoculated into SC-ADE-URA  
370 liquid medium and grown overnight (to counter-select mutations in *ADE2* and *URA3*). Then, aliquots were  
371 inoculated into YPAD and grown overnight to allow for marker loss from the rDNA. Dilutions were plated on  
372 5-FOA plates (selection for *URA3* loss) and incubated as in *ADE2* loss assay above. After visual inspection, red  
373 sectorized colonies from 5-FOA plates were manually selected and their white sectors were streaked  
374 sequentially 2 times onto SC plates. Of ca. 50'000 colonies from 5-FOA plates, 30 independent, reproducibly  
375 high-sectoring isolates were chosen. These were back-crossed, sporulated, dissected and assessed for

376 segregation of the high sectoring phenotype. Isolates showing 2:2 segregation for sectoring (consistent with  
377 Mendelian mono-allelic mutations) were subjected to causative mutation identification using Pooled Linkage  
378 Analysis (as in (Birkeland et al. 2010; Lang et al. 2015)). Briefly, 20 spore colonies with a sectoring phenotype  
379 were pooled (+phenotype) and 20 white spore colonies were pooled (-phenotype) and their genomic DNA  
380 was isolated with a Qiagen genomic tip kit. Total genomic DNA of the two pools was submitted to iGE3  
381 Genomics Platform of University of Geneva for fragmentation, library preparation and whole genome deep  
382 sequencing. The resulting FASTQ files were mapped to *S. cerevisiae* genome with Mapping tool of  
383 'HTSstation' (David et al. 2014). The SNPs were identified with the SNP tool of 'HTSstation'. The SNPs  
384 unique/over-represented in the plus-phenotype pool compared to the minus-phenotype pool were identified  
385 in Excel.

### 386 ***Co-immunoprecipitation, SDS-PAGE and Western blot***

387 Co-immunoprecipitation was performed as in (Gambus et al. 2006) and (De Piccoli et al. 2012). Briefly, 50 mL  
388 of exponentially growing cells at  $OD_{600} = 0.6$  were pelleted, washed 2x times with cold  $H_2O$ , suspended in 1  
389 mL of Lysis Buffer (100 mM HEPES-KOH pH 7.9, 100 mM potassium acetate, 10 mM magnesium acetate, 10%  
390 glycerol, 0.1% NP-40, 2 mM EDTA, 2 mM glycerol 2-phosphate, and freshly added: 2 mM sodium fluoride, 1  
391 mM DTT, 1 mM PMSF, Roche Protease Inhibitor Cocktail and PhosStop) and transferred into a cryotube with  
392 500  $\mu$ L of Zirconia/silica beads. The cells were homogenized in a Minibeadbeater at max power 2x times for  
393 1.5 min with a 1 min interval. The lysed cells were recovered by centrifugation through a hole in the bottom  
394 of a cryotube and treated with 100 U of Benzonase (Millipore) for 40 min at  $+4^\circ C$  with rotation. The whole-  
395 cell extract (WCE) was obtained as supernatant after centrifugation at 13000 rpm for 30 min at  $+4^\circ C$ . 30  $\mu$ L  
396 of IgG Sepharose beads pre-washed 4x times with Lysis Buffer were used for immunoprecipitation of the TAP-  
397 tagged proteins from the WCE during 2 hrs at  $+4^\circ C$  with rotation. The beads were washed 3x times with Lysis

398 Buffer at +4°C with rotation and boiled for 10 min with 50  $\mu$ L of 2x Laemmli Buffer. The proteins were  
399 resolved on 8% iD PAGE GELS (Eurogentec), transferred onto nitrocellulose membrane (Amersham). The  
400 proteins were detected with anti-TAP (ThermoFisher), anti-MYC (Cell Singaling) or anti-FLAG (Sigma)  
401 antibodies. For Csm3-TAP protein level detection (Fig. 4A) and for Rad53 phosphorylation detection (Fig. 4C  
402 and 4D) total cellular proteins were isolated using TCA-Urea method (Mattarocci et al. 2014). Total and  
403 active auto-phosphorylated Rad53 were detected with Rad53 protein antibodies (Mab clone EL7) and (Mab  
404 clone F9) respectively provided by A. Pellicoli (University of Milan) (Fiorani et al. 2008).

#### 405 ***Statistical methods***

406 Welch's t test (two-tailed, unpaired t test with Welch's correction) was used to assess statistical significance  
407 of differences in all the quantitative comparisons (\* $p < 0.05$ ; \*\* $p < 0.01$ ; \*\*\* $p < 0.001$ ; \*\*\*\* $p < 0.0001$ ). Mean  
408 values  $\pm$  SEM (standard error of the mean) are reported on graphs. GraphPad Prism 8 (GraphPad Software,  
409 Inc) was used to prepare the graphs and perform statistical comparisons.

410

#### 411 **Acknowledgements**

412 We thank Nataliia Serbyn for discussions, advice and assistance; Jessica Bruzzone for assistance with  
413 sequencing library preparation, Slawomir Kubik for advice on data analysis and all members of Shore Lab for  
414 critical comments. We thank iGE3 Genomics Platform of the University of Geneva for sequencing library  
415 preparation and high-throughput sequencing experiments. We thank Benoit Kornmann for the advice on the  
416 Pooled Linkage Analysis; Usui Takeo for sharing 12gene $\Delta$ OHSR background strains and Francoise Stutz for the  
417 BY deletion and DAMP strains. We thank Nicolas Roggli for expert graphical work; Pascal Damay for ordering  
418 and maintaining reagent stocks.

419

## 420 **Author contributions**

421 MS conceived the project. MS, BA and DS designed all the experiments. MS, BA, AMZ, VI, GC and DD  
422 performed the experiments and analyzed the data. BA and VI contributed strains and reagents. MS wrote  
423 the manuscript, which was revised by MS and DS with input from BA.

## 424 **Declaration of Interests**

425 The authors declare no competing interests.

426

## 427 **REFERENCES**

428

- 429 Azvolinsky A, Dunaway S, Torres JZ, Bessler JB, Zakian VA. 2006. The *S. cerevisiae* Rrm3p DNA helicase  
430 moves with the replication fork and affects replication of all yeast chromosomes. *Genes Dev* **20**:  
431 3104-3116.
- 432 Azvolinsky A, Giresi PG, Lieb JD, Zakian VA. 2009. Highly transcribed RNA polymerase II genes are  
433 impediments to replication fork progression in *Saccharomyces cerevisiae*. *Mol Cell* **34**: 722-734.
- 434 Bairwa NK, Mohanty BK, Stamenova R, Curcio MJ, Bastia D. 2011. The intra-S phase checkpoint protein  
435 Tof1 collaborates with the helicase Rrm3 and the F-box protein Dia2 to maintain genome  
436 stability in *Saccharomyces cerevisiae*. *J Biol Chem* **286**: 2445-2454.
- 437 Bando M, Katou Y, Komata M, Tanaka H, Itoh T, Sutani T, Shirahige K. 2009. Csm3, Tof1, and Mrc1 form a  
438 heterotrimeric mediator complex that associates with DNA replication forks. *J Biol Chem* **284**:  
439 34355-34365.
- 440 Baranello L, Wojtowicz D, Cui K, Devaiah BN, Chung HJ, Chan-Salis KY, Guha R, Wilson K, Zhang X, Zhang  
441 H et al. 2016. RNA Polymerase II Regulates Topoisomerase 1 Activity to Favor Efficient  
442 Transcription. *Cell* **165**: 357-371.
- 443 Baxter J, Diffley JF. 2008. Topoisomerase II inactivation prevents the completion of DNA replication in  
444 budding yeast. *Mol Cell* **30**: 790-802.
- 445 Bell SP, Labib K. 2016. Chromosome Duplication in *Saccharomyces cerevisiae*. *Genetics* **203**: 1027-1067.

- 446 Bermejo R, Dokhani Y, Capra T, Katou YM, Tanaka H, Shirahige K, Foiani M. 2007. Top1- and Top2-  
447 mediated topological transitions at replication forks ensure fork progression and stability and  
448 prevent DNA damage checkpoint activation. *Genes Dev* **21**: 1921-1936.
- 449 Bianco JN, Bergoglio V, Lin YL, Pillaire MJ, Schmitz AL, Gilhodes J, Lusque A, Mazieres J, Lacroix-Triki M,  
450 Roumeliotis TI et al. 2019. Overexpression of Claspin and Timeless protects cancer cells from  
451 replication stress in a checkpoint-independent manner. *Nature Communications* **10**.
- 452 Birkeland SR, Jin N, Ozdemir AC, Lyons RH, Jr., Weisman LS, Wilson TE. 2010. Discovery of mutations in  
453 *Saccharomyces cerevisiae* by pooled linkage analysis and whole-genome sequencing. *Genetics*  
454 **186**: 1127-1137.
- 455 Brewer BJ, Fangman WL. 1988. A replication fork barrier at the 3' end of yeast ribosomal RNA genes. *Cell*  
456 **55**: 637-643.
- 457 Brill SJ, DiNardo S, Voelkel-Meiman K, Sternglanz R. 1987. Need for DNA topoisomerase activity as a  
458 swivel for DNA replication for transcription of ribosomal RNA. *Nature* **326**: 414-416.
- 459 Chinen T, Ota Y, Nagumo Y, Masumoto H, Usui T. 2011. Construction of multidrug-sensitive yeast with  
460 high sporulation efficiency. *Biosci Biotechnol Biochem* **75**: 1588-1593.
- 461 Cho WH, Kang YH, An YY, Tappin I, Hurwitz J, Lee JK. 2013. Human Tim-Tipin complex affects the  
462 biochemical properties of the replicative DNA helicase and DNA polymerases. *Proc Natl Acad Sci*  
463 *U S A* **110**: 2523-2527.
- 464 Choi Y, Sims GE, Murphy S, Miller JR, Chan AP. 2012. Predicting the functional effect of amino acid  
465 substitutions and indels. *PLoS One* **7**: e46688.
- 466 Chou DM, Elledge SJ. 2006. Tipin and Timeless form a mutually protective complex required for  
467 genotoxic stress resistance and checkpoint function. *Proc Natl Acad Sci U S A* **103**: 18143-18147.
- 468 Christman MF, Dietrich FS, Fink GR. 1988. Mitotic recombination in the rDNA of *S. cerevisiae* is  
469 suppressed by the combined action of DNA topoisomerases I and II. *Cell* **55**: 413-425.
- 470 Dalgaard JZ, Klar AJ. 2000. *swi1* and *swi3* perform imprinting, pausing, and termination of DNA  
471 replication in *S. pombe*. *Cell* **102**: 745-751.
- 472 David FP, Delafontaine J, Carat S, Ross FJ, Lefebvre G, Jarosz Y, Sinclair L, Noordermeer D, Rougemont J,  
473 Leleu M. 2014. HTSstation: a web application and open-access libraries for high-throughput  
474 sequencing data analysis. *PLoS One* **9**: e85879.
- 475 De Piccoli G, Katou Y, Itoh T, Nakato R, Shirahige K, Labib K. 2012. Replisome stability at defective DNA  
476 replication forks is independent of S phase checkpoint kinases. *Mol Cell* **45**: 696-704.
- 477 Di Felice F, Cioci F, Camilloni G. 2005. FOB1 affects DNA topoisomerase I *in vivo* cleavages in the  
478 enhancer region of the *Saccharomyces cerevisiae* ribosomal DNA locus. *Nucleic Acids Res* **33**:  
479 6327-6337.
- 480 Duguet M. 1997. When helicase and topoisomerase meet! *J Cell Sci* **110 ( Pt 12)**: 1345-1350.
- 481 Fiorani S, Mimun G, Caleca L, Piccini D, Pelliccioli A. 2008. Characterization of the activation domain of the  
482 Rad53 checkpoint kinase. *Cell Cycle* **7**: 493-499.
- 483 Foss EJ. 2001. Toflp regulates DNA damage responses during S phase in *Saccharomyces cerevisiae*.  
484 *Genetics* **157**: 567-577.
- 485 Gadaleta MC, Noguchi E. 2017. Regulation of DNA Replication through Natural Impediments in the  
486 Eukaryotic Genome. *Genes (Basel)* **8**.
- 487 Gaillard H, Garcia-Muse T, Aguilera A. 2015. Replication stress and cancer. *Nat Rev Cancer* **15**: 276-289.

- 488 Gambus A, Jones RC, Sanchez-Diaz A, Kanemaki M, van Deursen F, Edmondson RD, Labib K. 2006. GINS  
489 maintains association of Cdc45 with MCM in replisome progression complexes at eukaryotic  
490 DNA replication forks. *Nat Cell Biol* **8**: 358-366.
- 491 Haruki H, Nishikawa J, Laemmli UK. 2008. The anchor-away technique: rapid, conditional establishment  
492 of yeast mutant phenotypes. *Mol Cell* **31**: 925-932.
- 493 Hizume K, Endo S, Muramatsu S, Kobayashi T, Araki H. 2018. DNA polymerase epsilon-dependent  
494 modulation of the pausing property of the CMG helicase at the barrier. *Genes Dev* **32**: 1315-  
495 1320.
- 496 Hodgson B, Calzada A, Labib K. 2007. Mrc1 and Tof1 regulate DNA replication forks in different ways  
497 during normal S phase. *Mol Biol Cell* **18**: 3894-3902.
- 498 Hosono Y, Abe T, Higuchi M, Kajii K, Sakuraba S, Tada S, Enomoto T, Seki M. 2014. Tipin functions in the  
499 protection against topoisomerase I inhibitor. *J Biol Chem* **289**: 11374-11384.
- 500 Ivessa AS, Lenzmeier BA, Bessler JB, Goudsouzian LK, Schnakenberg SL, Zakian VA. 2003. The  
501 *Saccharomyces cerevisiae* helicase Rrm3p facilitates replication past nonhistone protein-DNA  
502 complexes. *Mol Cell* **12**: 1525-1536.
- 503 Ivessa AS, Zhou JQ, Zakian VA. 2000. The *Saccharomyces* Pif1p DNA helicase and the highly related  
504 Rrm3p have opposite effects on replication fork progression in ribosomal DNA. *Cell* **100**: 479-  
505 489.
- 506 Kaeberlein M, McVey M, Guarente L. 1999. The SIR2/3/4 complex and SIR2 alone promote longevity in  
507 *Saccharomyces cerevisiae* by two different mechanisms. *Genes Dev* **13**: 2570-2580.
- 508 Keszthelyi A, Minchell NE, Baxter J. 2016. The Causes and Consequences of Topological Stress during  
509 DNA Replication. *Genes (Basel)* **7**.
- 510 Kim RA, Wang JC. 1989a. Function of DNA topoisomerases as replication swivels in *Saccharomyces*  
511 *cerevisiae*. *J Mol Biol* **208**: 257-267.
- 512 -. 1989b. A subthreshold level of DNA topoisomerases leads to the excision of yeast rDNA as  
513 extrachromosomal rings. *Cell* **57**: 975-985.
- 514 Kobayashi T, Horiuchi T, Tongaonkar P, Vu L, Nomura M. 2004. SIR2 regulates recombination between  
515 different rDNA repeats, but not recombination within individual rRNA genes in yeast. *Cell* **117**:  
516 441-453.
- 517 Krawczyk C, Dion V, Schar P, Fritsch O. 2014. Reversible Top1 cleavage complexes are stabilized strand-  
518 specifically at the ribosomal replication fork barrier and contribute to ribosomal DNA stability.  
519 *Nucleic Acids Res* **42**: 4985-4995.
- 520 Lang AB, John Peter AT, Walter P, Kornmann B. 2015. ER-mitochondrial junctions can be bypassed by  
521 dominant mutations in the endosomal protein Vps13. *J Cell Biol* **210**: 883-890.
- 522 Lou H, Komata M, Katou Y, Guan Z, Reis CC, Budd M, Shirahige K, Campbell JL. 2008. Mrc1 and DNA  
523 polymerase epsilon function together in linking DNA replication and the S phase checkpoint. *Mol*  
524 *Cell* **32**: 106-117.
- 525 Mattarocci S, Shyian M, Lemmens L, Damay P, Altintas DM, Shi T, Bartholomew CR, Thoma NH, Hardy  
526 CF, Shore D. 2014. Rif1 controls DNA replication timing in yeast through the PP1 phosphatase  
527 Glc7. *Cell Rep* **7**: 62-69.
- 528 McFarlane RJ, Mian S, Dalgaard JZ. 2010. The many facets of the Tim-Tipin protein families' roles in  
529 chromosome biology. *Cell Cycle* **9**: 700-705.

- 530 Mohanty BK, Bairwa NK, Bastia D. 2006. The Tof1p-Csm3p protein complex counteracts the Rrm3p  
531 helicase to control replication termination of *Saccharomyces cerevisiae*. *Proc Natl Acad Sci U S A*  
532 **103**: 897-902.
- 533 Morawska M, Ulrich HD. 2013. An expanded tool kit for the auxin-inducible degron system in budding  
534 yeast. *Yeast* **30**: 341-351.
- 535 Mundbjerg K, Jorgensen SW, Fredsoe J, Nielsen I, Pedersen JM, Bentsen IB, Lisby M, Bjergbaek L,  
536 Andersen AH. 2015. Top2 and Sgs1-Top3 Act Redundantly to Ensure rDNA Replication  
537 Termination. *PLoS Genet* **11**: e1005697.
- 538 Park H, Sternglanz R. 1999. Identification and characterization of the genes for two topoisomerase I-  
539 interacting proteins from *Saccharomyces cerevisiae*. *Yeast* **15**: 35-41.
- 540 Pasero P, Bensimon A, Schwob E. 2002. Single-molecule analysis reveals clustering and epigenetic  
541 regulation of replication origins at the yeast rDNA locus. *Genes Dev* **16**: 2479-2484.
- 542 Pommier Y, Sun Y, Huang SN, Nitiss JL. 2016. Roles of eukaryotic topoisomerases in transcription,  
543 replication and genomic stability. *Nat Rev Mol Cell Biol* **17**: 703-721.
- 544 Redon C, Pilch DR, Bonner WM. 2006. Genetic analysis of *Saccharomyces cerevisiae* H2A serine 129  
545 mutant suggests a functional relationship between H2A and the sister-chromatid cohesion  
546 partners Csm3-Tof1 for the repair of topoisomerase I-induced DNA damage. *Genetics* **172**: 67-  
547 76.
- 548 Reid RJ, Gonzalez-Barrera S, Sunjevaric I, Alvaro D, Ciccone S, Wagner M, Rothstein R. 2011. Selective  
549 ploidy ablation, a high-throughput plasmid transfer protocol, identifies new genes affecting  
550 topoisomerase I-induced DNA damage. *Genome Res* **21**: 477-486.
- 551 Schalbetter SA, Mansoubi S, Chambers AL, Downs JA, Baxter J. 2015. Fork rotation and DNA  
552 precatenation are restricted during DNA replication to prevent chromosomal instability. *Proc*  
553 *Natl Acad Sci U S A* **112**: E4565-4570.
- 554 Shyian M, Mattarocci S, Albert B, Hafner L, Lezaja A, Costanzo M, Boone C, Shore D. 2016. Budding Yeast  
555 Rif1 Controls Genome Integrity by Inhibiting rDNA Replication. *PLoS Genet* **12**: e1006414.
- 556 Simon AC, Zhou JC, Perera RL, van Deursen F, Evrin C, Ivanova ME, Kilkenny ML, Renault L, Kjaer S,  
557 Matak-Vinkovic D et al. 2014. A Ctf4 trimer couples the CMG helicase to DNA polymerase alpha  
558 in the eukaryotic replisome. *Nature* **510**: 293-297.
- 559 Strumberg D, Pilon AA, Smith M, Hickey R, Malkas L, Pommier Y. 2000. Conversion of topoisomerase I  
560 cleavage complexes on the leading strand of ribosomal DNA into 5'-phosphorylated DNA  
561 double-strand breaks by replication runoff. *Mol Cell Biol* **20**: 3977-3987.
- 562 Teves SS, Henikoff S. 2014. Transcription-generated torsional stress destabilizes nucleosomes. *Nat Struct*  
563 *Mol Biol* **21**: 88-94.
- 564 Tourriere H, Versini G, Cordon-Preciado V, Alabert C, Pasero P. 2005. Mrc1 and Tof1 promote replication  
565 fork progression and recovery independently of Rad53. *Mol Cell* **19**: 699-706.
- 566 Valjavec-Gratian M, Henderson TA, Hill TM. 2005. Tus-mediated arrest of DNA replication in *Escherichia*  
567 *coli* is modulated by DNA supercoiling. *Mol Microbiol* **58**: 758-773.
- 568 van Loenhout MT, de Grunt MV, Dekker C. 2012. Dynamics of DNA supercoils. *Science* **338**: 94-97.
- 569 Voineagu I, Narayanan V, Lobachev KS, Mirkin SM. 2008. Replication stalling at unstable inverted  
570 repeats: interplay between DNA hairpins and fork stabilizing proteins. *Proc Natl Acad Sci U S A*  
571 **105**: 9936-9941.



572 Yeeles JT, Janska A, Early A, Diffley JF. 2017. How the Eukaryotic Replisome Achieves Rapid and Efficient  
573 DNA Replication. *Mol Cell* **65**: 105-116.

574

# Shyian\_Fig1

bioRxiv preprint doi: <https://doi.org/10.1101/738328>; this version posted August 19, 2019. The copyright holder for this preprint (which was not certified by peer review) is the author/funder. All rights reserved. No reuse allowed without permission.

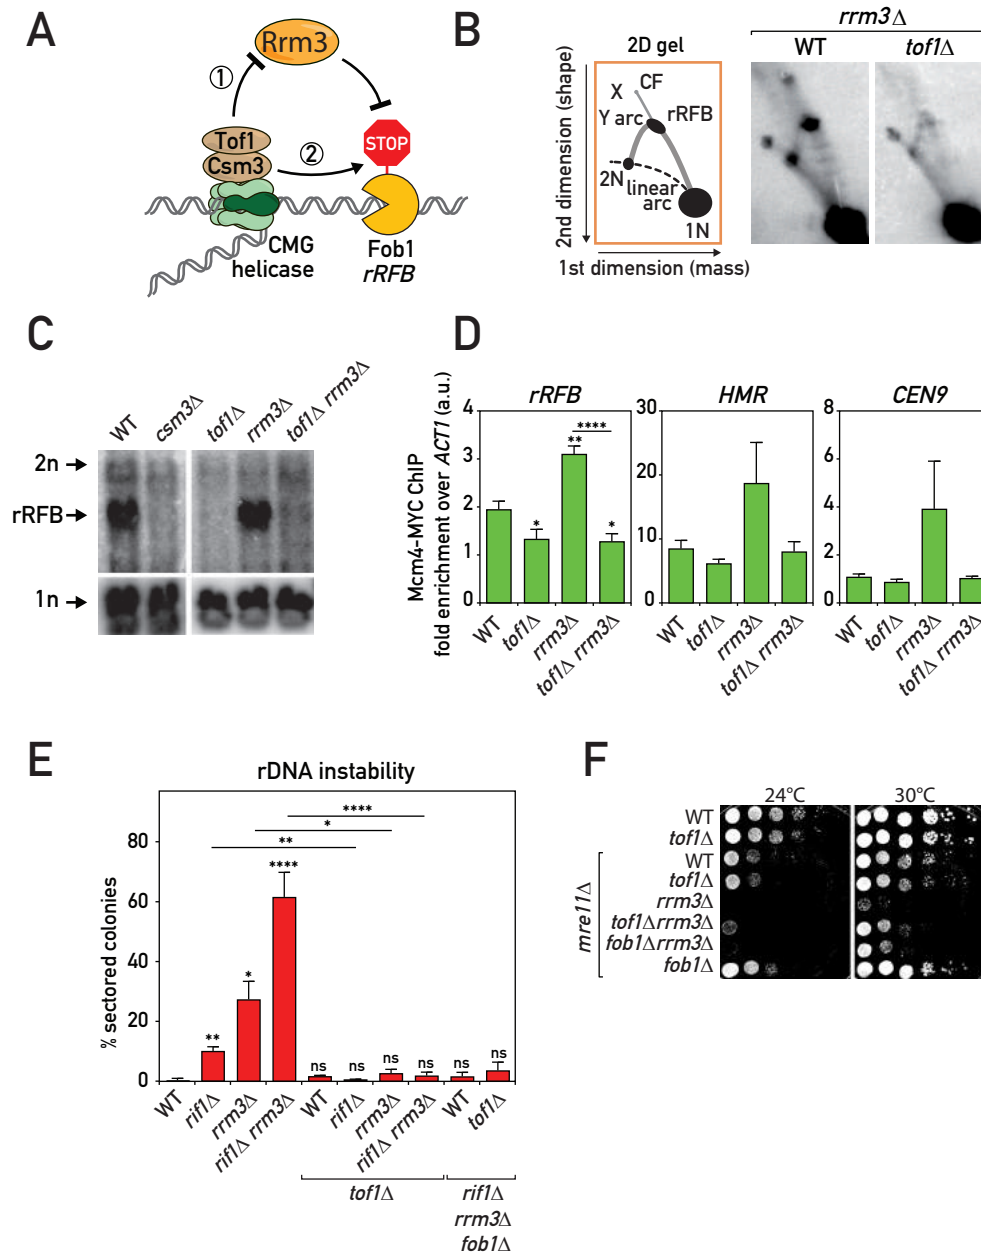

**Figure 1.** Tof1-Csm3 complex functions independently of Rrm3 helicase (A) Schematics of Rrm3-dependent ('1') and -independent ('2') mechanisms for Tof1-Csm3 role in replication fork pausing at proteinaceous barriers. (B-D) *tof1Δ* suppressed fork pausing in *rrm3Δ* cells: (B) Schematic (left) and representative images (right) of replication intermediates detected in the asynchronous cultures of strains of indicated genotypes by Southern hybridization with rDNA rRFB probe on *Bgl* II-digested DNA separated with 2D gels and blotted to nylon membrane; (C) same as in (B) but Southern blot done directly on 1st dimension gels; (D) Replisome pausing detection with Mcm4-MYC ChIP-qPCR at several pausing sites in asynchronous cultures of strains of the designated genotypes. (E) *tof1Δ* suppressed rDNA instability in *rrm3Δ* and *rif1Δ* cells – rDNA instability measurement with *ADE2* marker loss assay. (F) *tof1Δ* partially alleviated *mre11Δ rrm3Δ* synthetic sickness – serial dilution growth assay. X – X-shaped molecules; CF – converging forks. Means with SEM are plotted; Welch's t test was used for quantitative comparisons (\* $p < 0.05$ ; \*\* $p < 0.01$ ; \*\*\* $p < 0.001$ ; \*\*\*\* $p < 0.0001$ ; ns – not significant). See also Fig. S1.

# Shyian\_Fig2

bioRxiv preprint doi: <https://doi.org/10.1101/738328>; this version posted August 19, 2019. The copyright holder for this preprint (which was not certified by peer review) is the author/funder. All rights reserved. No reuse allowed without permission.

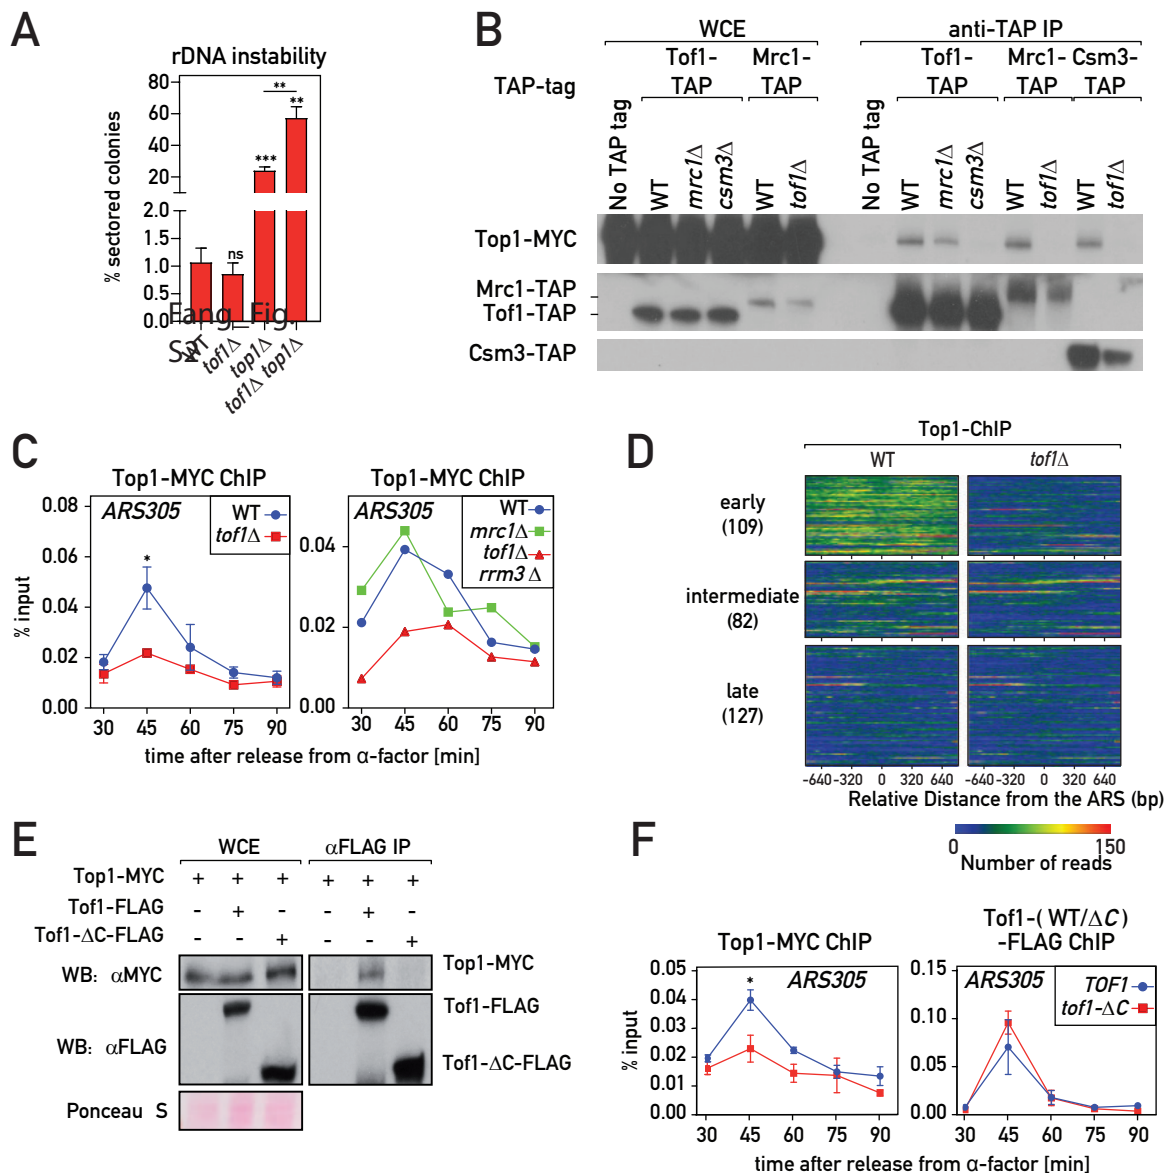

**Figure 2.** Tof1-Csm3-dependent recruitment of Top1 to the replisome (A) *tof1*Δ did not suppress *top1*Δ-induced rDNA instability, as measured with *ADE2* marker loss assay. (B) Top1 was co-immunoprecipitated with MTC complex in a Tof1- and Csm3-dependent but Mrc1-independent manner. (C-D) Chromatin DNA immunoprecipitated with Top1-MYC from cell cultures synchronously released into S phase from G1 ( $\alpha$ -factor) arrest was: (C) subjected to qPCR on *ARS305*; (D) immunoprecipitated DNA from 45' time point (early S phase) was Illumina sequenced, reads mapping to early, intermediate and late origins are shown as a heat map. (E-F) Tof1 lacking C-terminus (*tof1*- $\Delta$ C strains) did not co-immunoprecipitate Top1-MYC (E) and was defective in Top1-MYC association with *ARS305* during S phase (F). Here and on subsequent figures: *TOF1* = *TOF1-3xFLAG*; *tof1*- $\Delta$ C = *tof1*- $\Delta$ 981-1238-3xFLAG. Values plotted and statistics as in Fig. 1. See also Fig. S2.

# Shyian\_Fig3

bioRxiv preprint doi: <https://doi.org/10.1101/738328>; this version posted August 19, 2019. The copyright holder for this preprint (which was not certified by peer review) is the author/funder. All rights reserved. No reuse allowed without permission.

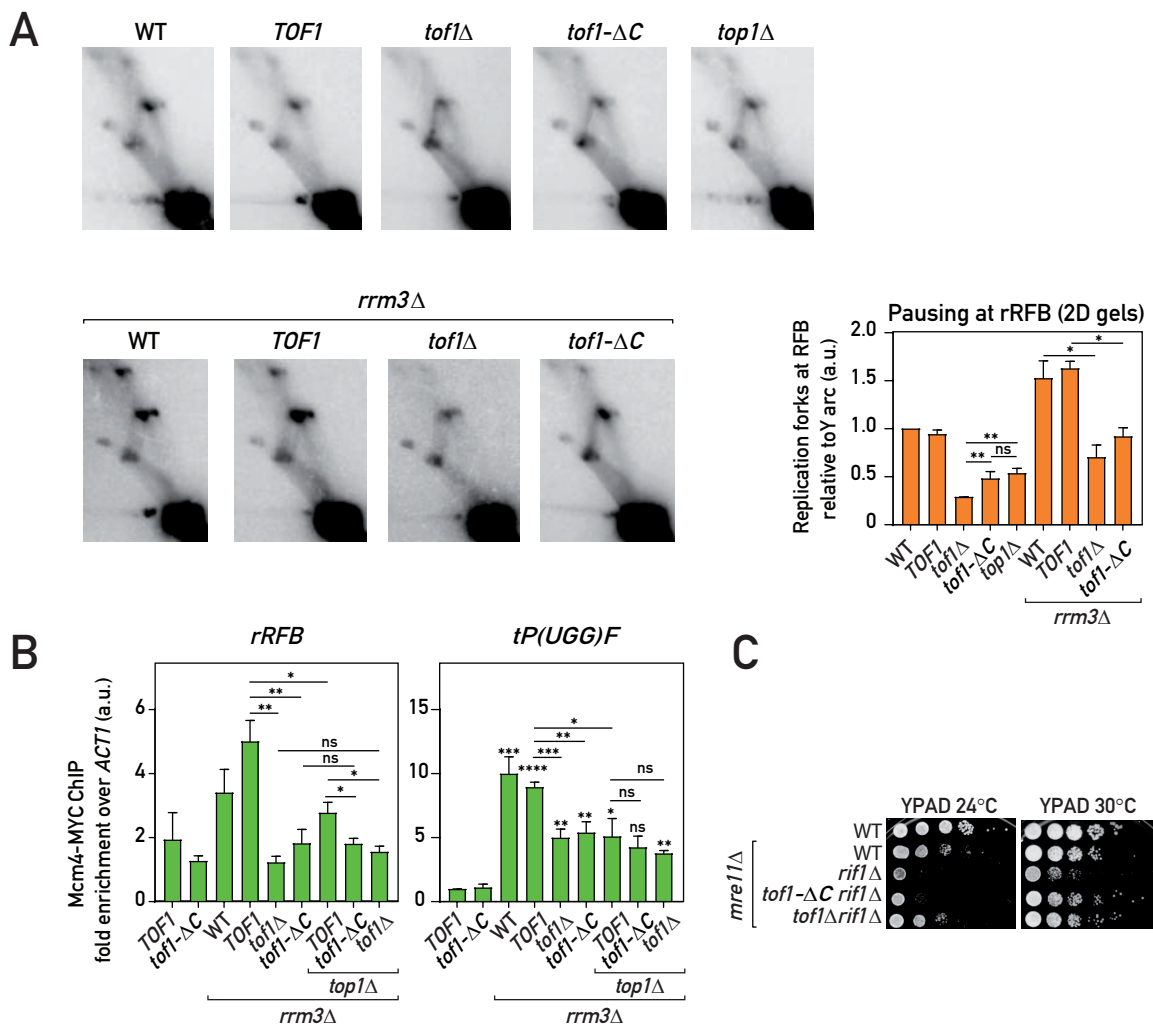

**Figure 3.** *Tof1*-C-dependent recruitment of Top1 to the replisome promotes fork pausing (A) Replication fork pausing at rRFB measured by 2D gels (as in Fig. 1B) in the strains of indicated genotypes: representative gel images and quantification (pausing in WT = 1, see Materials and Methods). (B) Replisome pausing at rRFB and a tRNA gene (*tP(UGG)F*) detected with Mcm4-MYC ChIP-qPCR in asynchronous cultures. (C) *Tof1*- $\Delta$ C is less toxic in *rif1* $\Delta$  *mre11* $\Delta$  cells than wild type *Tof1*. Values plotted and statistics as in Fig. 1. See also Fig. S3.

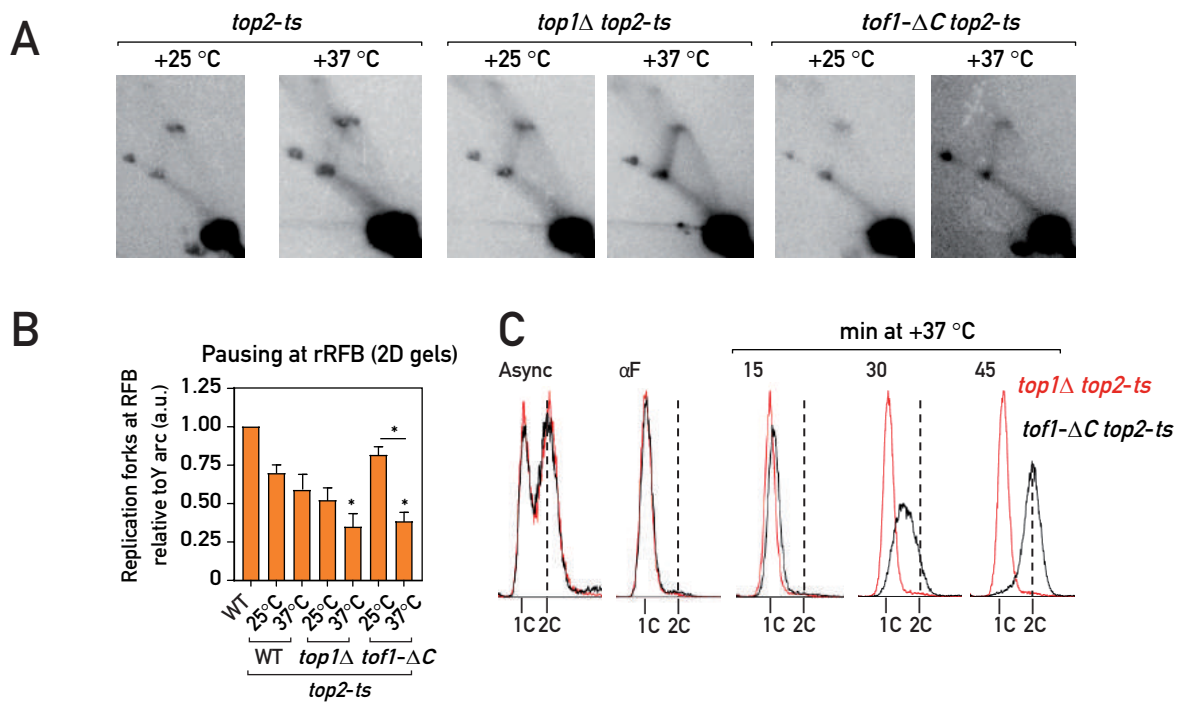

**Figure 4.** Top2 partially compensates for the fork pausing upon Top1 loss from the replisome (A-B) 2D agarose gel Southern blots (as in Fig. 1B): representative images (A) and quantification (B; pausing in WT = 1, see Materials and Methods) of replication intermediates in asynchronous cultures of the strains of indicated genotypes cultured continuously at +25 °C or transferred for 1 hour to +37 °C. (C) Flow cytometry DNA content profile of the *top1Δ top2-ts* (red) and *tof1-ΔC top2-ts* (black) strains upon release in S phase at +37 °C from G1 ( $\alpha$ F) arrest. Values plotted and statistics as in Fig. 1. Stars indicate P values for comparison with *top2-ts* strain at +25 °C. See also Fig. S4.

# Shyian\_Fig5

bioRxiv preprint doi: <https://doi.org/10.1101/738328>; this version posted August 19, 2019. The copyright holder for this preprint (which was not certified by peer review) is the author/funder. All rights reserved. No reuse allowed without permission.

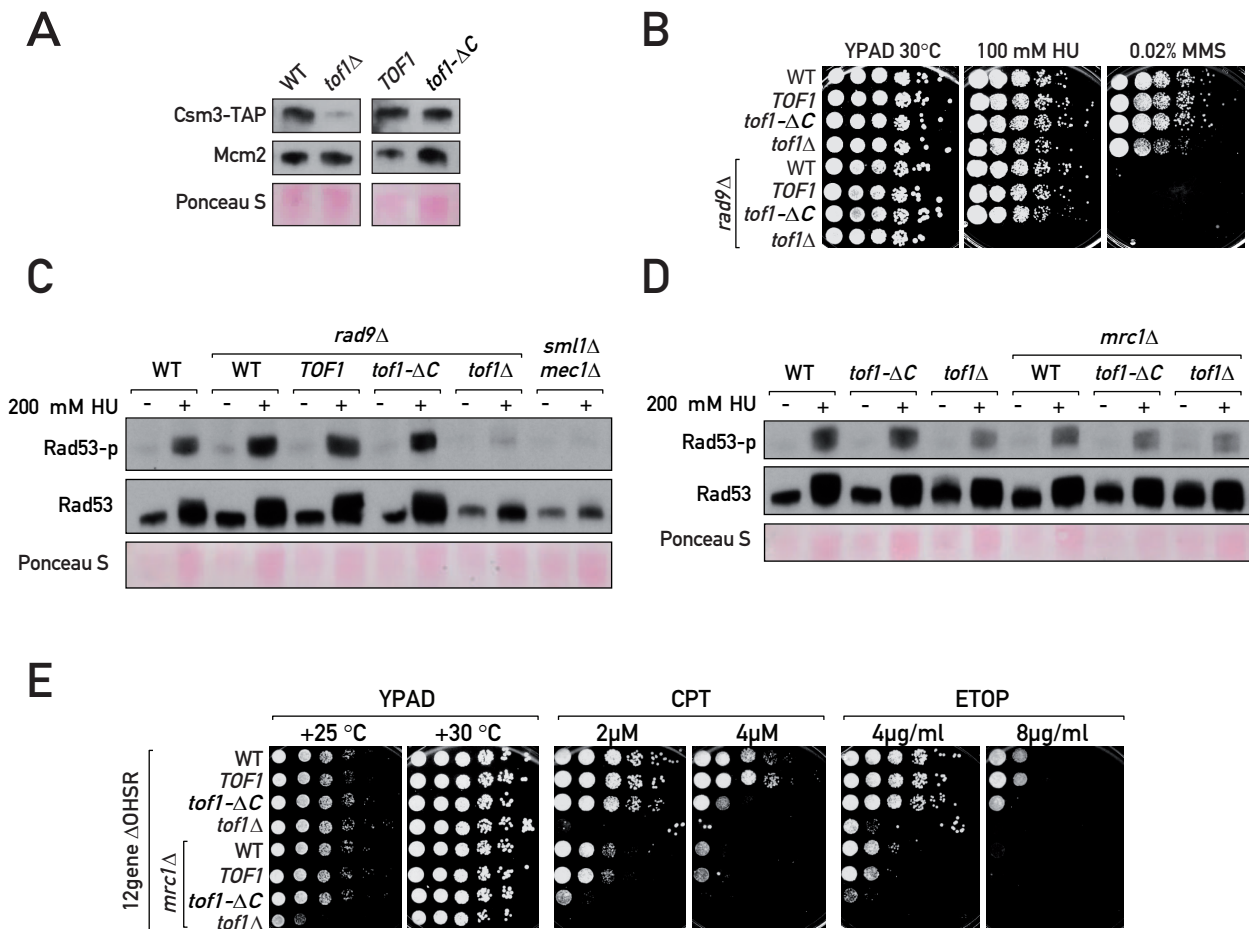

**Figure 5.** Fork pausing is a separable function of Tof1-Csm3 (A, C-D) Western blotting of TCA-extracted proteins. (A) In contrast to *tof1* $\Delta$ , *tof1*- $\Delta$ C cells do not degrade Csm3-TAP. (B, E) Serial dilution growth assays. (B) Tof1- $\Delta$ C supports viability of *rad9* $\Delta$  cells under hydroxyurea (HU) treatment. (C-D) Tof1- $\Delta$ C is proficient in DRC activation under HU treatment. (E) Mrc1 supports *tof1*- $\Delta$ C cells survival under topoisomerase-blocking damage. CPT – camptothecin; ETOP – etoposide; MMS – methyl methanesulfonate; 12gene $\Delta$ OHSR – multidrug sensitive yeast background. See also Fig. S5.

# Shyian\_Fig6

bioRxiv preprint doi: <https://doi.org/10.1101/738328>; this version posted August 19, 2019. The copyright holder for this preprint (which was not certified by peer review) is the author/funder. All rights reserved. No reuse allowed without permission.

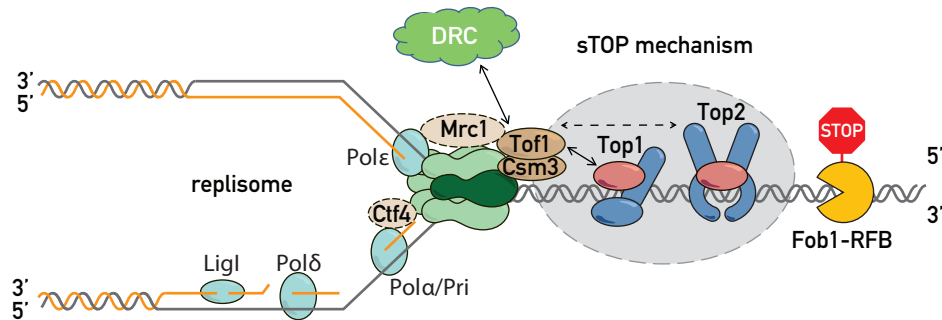

**Figure 6.** Replisome ‘sTOP’ model (‘slowing down with TOPoisomerases I-II’) Tof1-Csm3 promotes replication fork pausing at proteinaceous barriers via topoisomerase I (and II, dashed line with arrows), either by recruiting topoisomerases to the replisome or/and by recognizing topoisomerases bound in front of the fork. sTOP function of Tof1-Csm3 is distinct from its Mrc1-shared role in DRC (DNA replication checkpoint). See text for details.

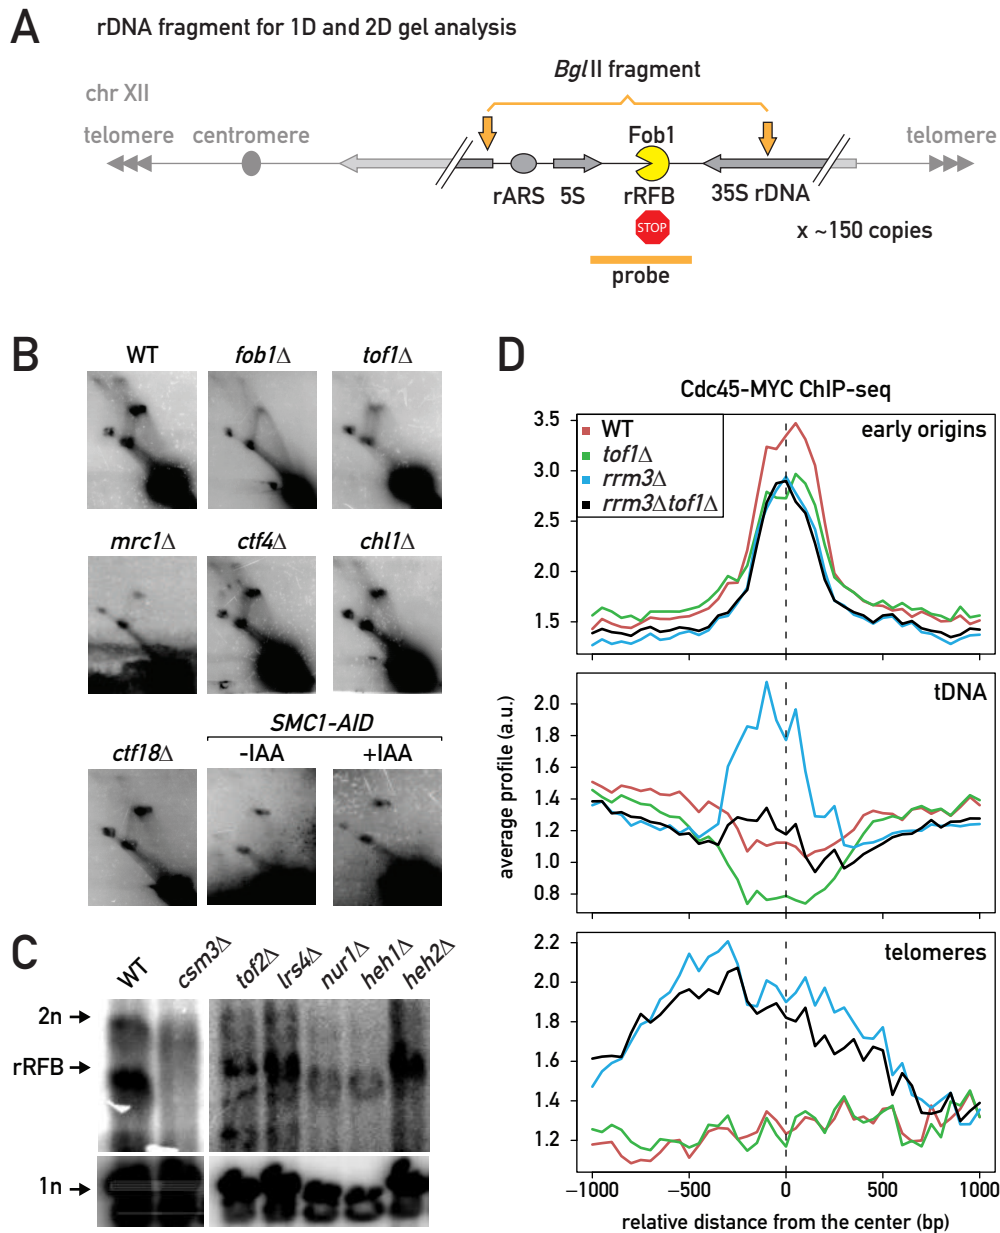

**Figure S1.** Related to Figure 1. Tof1-Csm3 complex functions independently of cohesion, peripheral anchoring and Rrm3 helicase (A) Diagram of the rDNA locus with the analyzed BglII fragment and location of the probe (rRFB) used for Southern blot hybridization of the 1D and 2D gels. (B) 2D gels for the estimation of fork pausing at rRFB in deletion mutants of the Replisome Progression Complex and sister chromatid cohesion establishment factors (*TOF1*, *MRC1*, *CTF4*, *CHL1*, and *CTF18*) and upon cohesin degradation with auxin (*SMC1-AID*). See Figure 1B for the diagram explaining DNA species on 2D gels. (C) 1D gels for the estimation of fork pausing at rRFB in deletion mutants of factors mediating peripheral anchoring of rDNA repeats to the nuclear envelope (cohibin and CLIP complexes). (D) Cdc45-MYC ChIP-seq in asynchronously growing cultures. Aggregation plots of the anti-MYC ChIP signal in Cdc45-MYC vs anti-MYC ChIP signal in WT not tagged control centered on early origins, tRNA genes and telomeres are shown.



# Shyian\_FigS2

bioRxiv preprint doi: <https://doi.org/10.1101/738328>; this version posted August 19, 2019. The copyright holder for this preprint (which was not certified by peer review) is the author/funder. All rights reserved. No reuse allowed without permission.

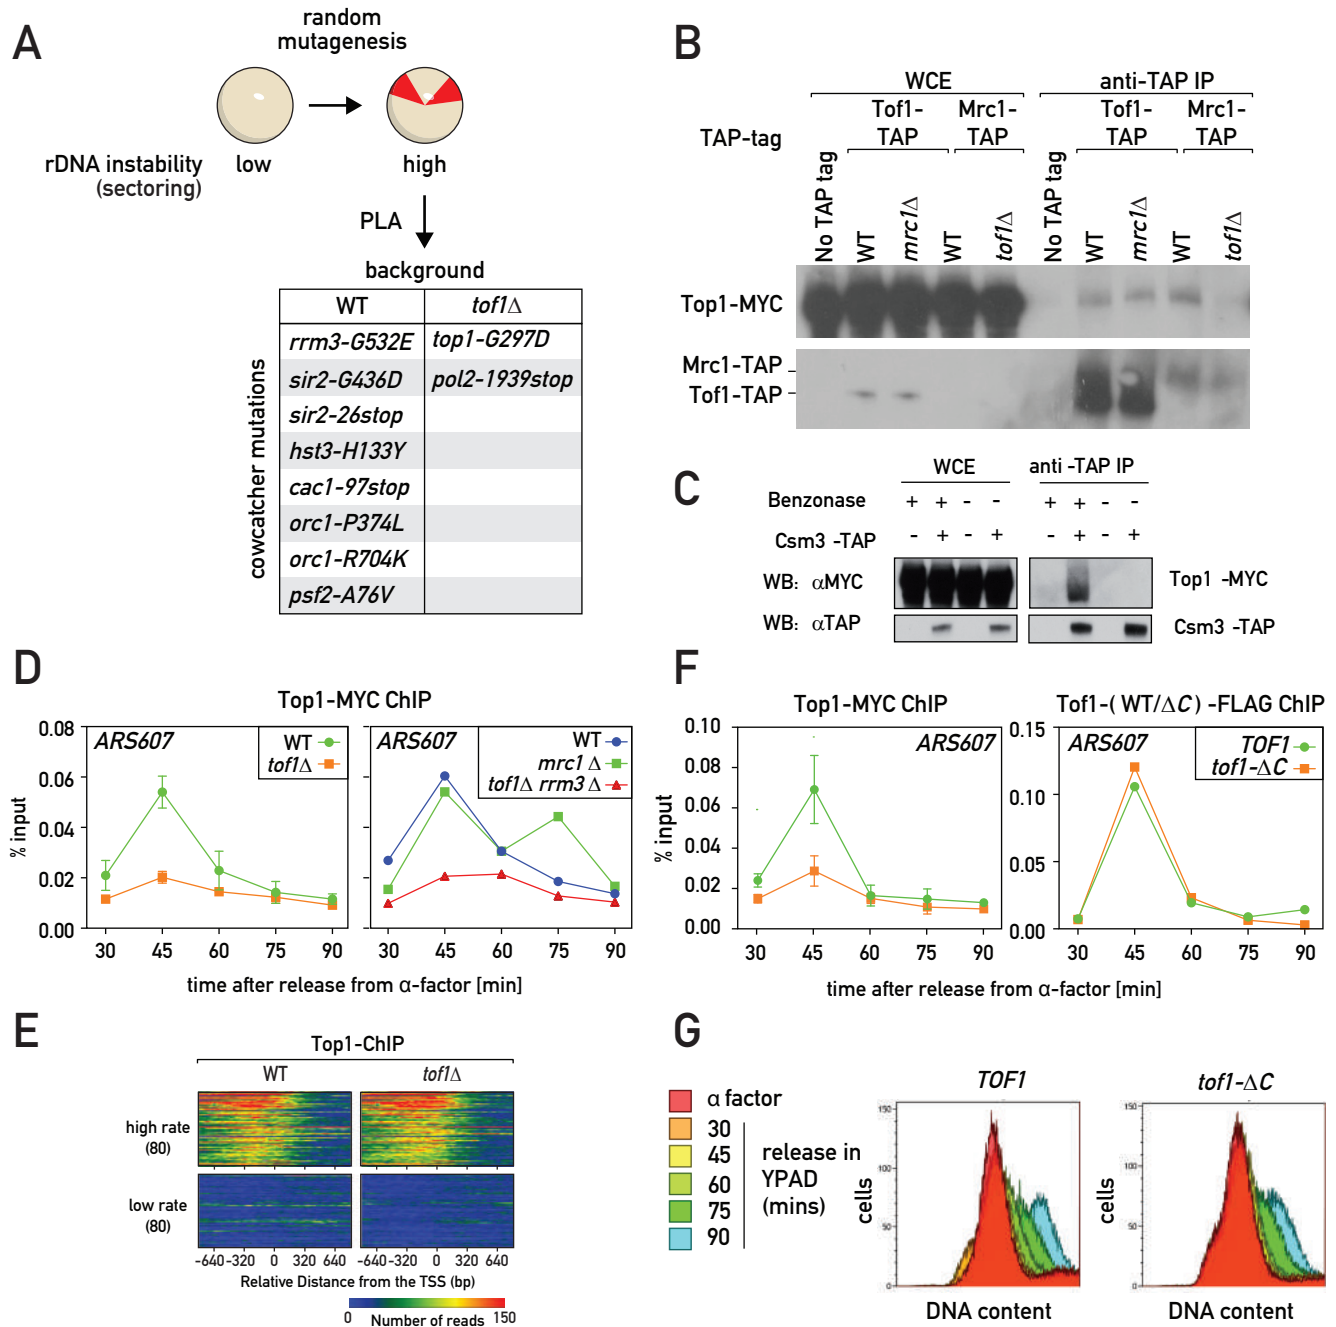

**Figure S2.** Related to Figure 2. Tof1-Csm3 recruits Top1 to the replisome (A) An outline of the “cowcatcher” screen and mutants identified by Pooled Linkage Analysis (PLA) as leading to elevated rDNA instability in WT and *tof1*Δ backgrounds. (B-C) Western blot detection of the Top1-MYC in Tof1-TAP and Mrc1-TAP (B) or Csm3-TAP (C) anti-TAP immunoprecipitates; DNA degradation by Benzonase was absolutely required to co-immunoprecipitate Top1 (C). (D-G) ChIP followed by qPCR at *ARS607* or high throughput sequencing of Top1-MYC and Tof1- or Tof1-ΔC-FLAG in cell cultures synchronously released in S phase from G1 (α-factor) arrest: Top1-MYC ChIP-qPCR in the strains of designated genotypes (D); distribution of reads mapped to transcription start sites (TSS) is similar in WT and *tof1*Δ cells (E); Top1-MYC (left panel) or Tof1-FLAG and Tof1-ΔC-FLAG (right panel) ChIP-qPCR in *TOF1* and *tof1*-ΔC cells (F); flow cytometry profiles in *TOF1* WT and *tof1*-ΔC cells (for the experiment depicted on the Figure 2F and S2F) (G).

# Shyian\_FigS3

bioRxiv preprint doi: <https://doi.org/10.1101/738328>; this version posted August 19, 2019. The copyright holder for this preprint (which was not certified by peer review) is the author/funder. All rights reserved. No reuse allowed without permission.

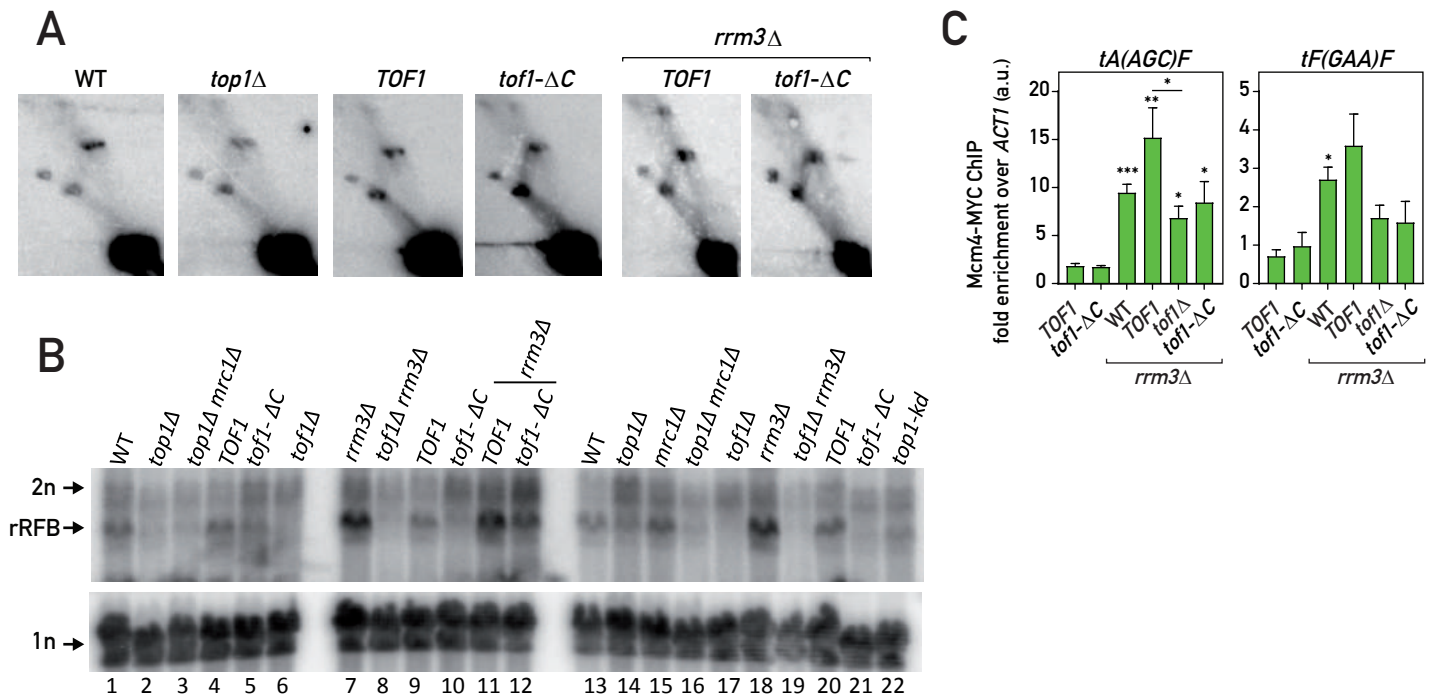

**Figure S3.** Related to Figure 3. Tof1-C with Top1 promote fork pausing (A-B) 2D gels (A) and 1D gels (B) of the *Bgl* II digested DNA isolated from asynchronous cell cultures and probed with rDNA rRFB probe. (C) Mcm4-MYC ChIP-qPCR in the asynchronous cultures of the strains of indicated genotypes for two tRNA genes. *top1-kd* – catalytically dead Top1 (*top1-Y727F*). Values plotted and statistics as in Figure 1.

# Shyian\_FigS4

bioRxiv preprint doi: <https://doi.org/10.1101/738328>; this version posted August 19, 2019. The copyright holder for this preprint (which was not certified by peer review) is the author/funder. All rights reserved. No reuse allowed without permission.

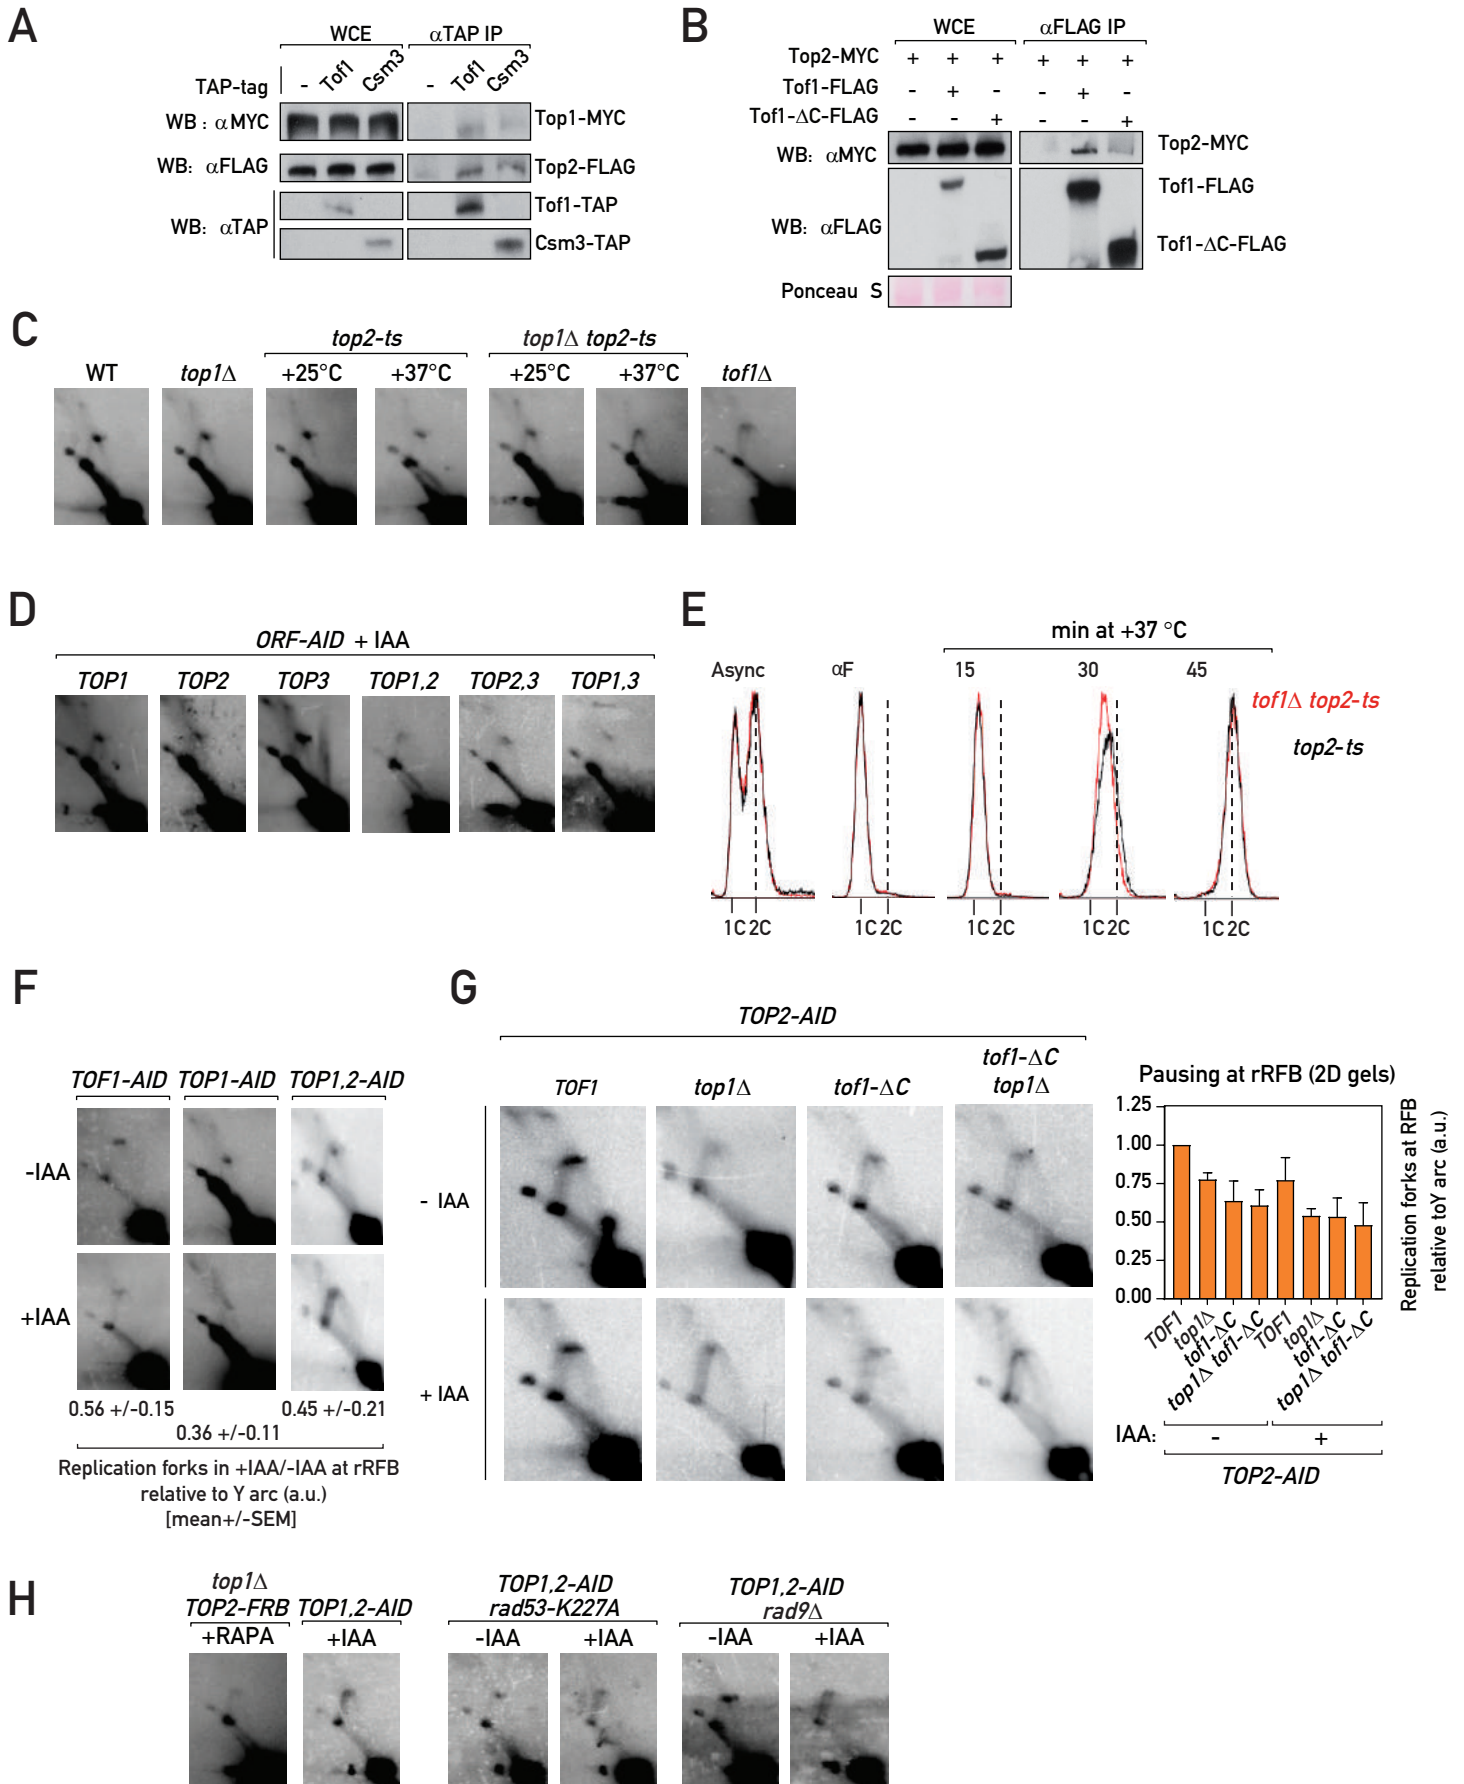

**Figure S4.** Related to Figure 4. Tof1-Csm3 engages Top1 and Top2 to pause the replisome (A-B) Co-immunoprecipitation experiments: Immunoprecipitates of Tof1 and Csm3 contained Top1 and Top2 (A), Top2 in the immunoprecipitates of Tof1-FLAG and Tof1- $\Delta$ C-FLAG (B). (C-D) 2D gels of the *Bgl* II digested DNA isolated from asynchronous cell cultures and probed with rDNA rRFB probe: DNA from asynchronous cultures of control strains (grown at +30 °C) or *top2-ts* strains (grown at +25 °C and shifted or not to +37 °C for 1 hour) (C); DNA from strains harboring AID-tagged topoisomerase genes *TOP1*, *TOP2* and *TOP3* from asynchronous cultures treated for 1 hour with 1 mM IAA (Indole-3-acetic acid) to degrade respective proteins (D). (E) Flow cytometry DNA content profile of the *tof1* $\Delta$  *top2-ts* (red) and *top2-ts* (black) strains upon release in S phase at +37 °C from G1 ( $\alpha$ F) arrest. (F-H) 2D gels as in Figure S4D): upon Tof1, Top1 or Top1 and Top2 degradation (F); upon Top2 degradation (left panel – representative images; right panel – quantifications) (G); fork pausing in strains additionally harboring mutations of the DNA damage checkpoint genes (*rad53-K227A* and *rad9* $\Delta$ ) (H). Values plotted and statistics as in Figure 1.

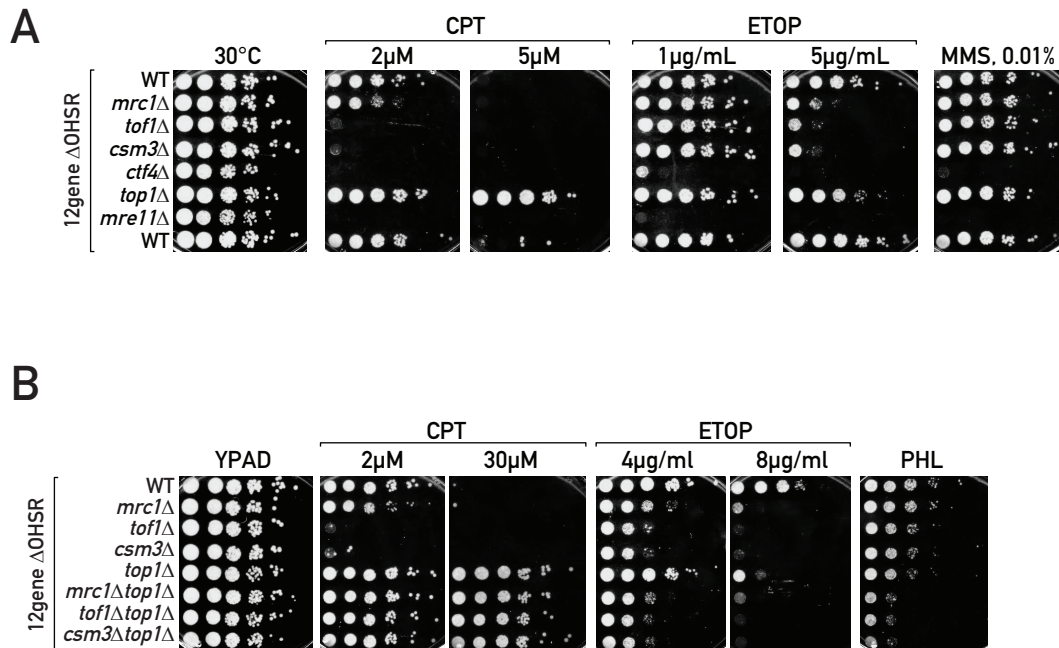

**Figure S5.** Related to Figure 5. Fork pausing complex protects cells from topoisomerase-blocking agents (A-B) Serial dilution growth assays: in mutants of replication fork progression complex (A) and in combinations of MTC genes deletion mutants and *top1* $\Delta$ . Genotoxic agents: CPT – camptothecin; ETOP – etoposide, MMS – methyl methanesulfonate (alkylating agent), PHL – phleomycin (used at 20  $\mu$ g/mL; DSB-inducing agent).

**Table S1. Yeast strains used in this study**

| Strain        | Genotype                                                                          | Figures             | Source                    |
|---------------|-----------------------------------------------------------------------------------|---------------------|---------------------------|
| YDS2          | <i>W303 (leu2-3,112 trp1-1 can1-100 ura3-1 ade2-1 his3-11,15) MATa WT</i>         | 4A, 4B, 3C          | Lab collection            |
| OTA017        | <i>12geneΔ0HSR (multidrug-sensitive yeast background) MATa</i>                    |                     | (Chinen et al., 2011)     |
| YMS1294 (5-1) | <i>W303 MATa RAD5+ bar1Δ MCM4-13MYC::HIS3MX6 rrm3Δ::HPHMX4</i>                    | 1B, 1D, 3A 3B, S3C  | This study                |
| YMS1299-13    | <i>W303 MATa RAD5+ bar1Δ MCM4-13MYC::HIS3MX6 rrm3Δ::HPHMX4 tof1Δ::LEU2</i>        | 1B, 1D, 3A, 3B, S3C | This study                |
| BY4741        | <i>BY (MATa his3Δ1 leu2Δ0 met15Δ0 ura3Δ0) MATa WT</i>                             | 1C, S1B, S1C        | Lab collection            |
| YMS1610       | <i>BY MATa csm3Δ::KANMX</i>                                                       | 1C, S1C             | This study                |
| YMS1266-I     | <i>W303 MATa RDN1::ADE2::URA3::TRP1 tof1Δ::HPHMX4</i>                             | 1C, 1E, S1B, S2A    | This study                |
| YMS909        | <i>W303 MATa RDN1::ADE2 rrm3Δ::KANMX6</i>                                         | 1C, 1E              | (Shyian et al., 2016)     |
| YMS1282-1     | <i>W303 MATa RDN1::ADE2 rrm3Δ::KANMX6 tof1Δ::HIS3MX6</i>                          | 1C                  | This study                |
| YSM266-4      | <i>W303 MATa RAD5+ bar1Δ MCM4-13MYC::HIS3MX6</i>                                  | 1D                  | (Matarrocci et al., 2014) |
| YMS1289-7     | <i>W303 MATa RAD5+ bar1Δ MCM4-13MYC::HIS3MX6 tof1Δ::LEU2</i>                      | 1D                  | This study                |
| YMS907        | <i>W303 MATa RDN1::ADE2</i>                                                       | 1E                  | (Shyian et al., 2016)     |
| YMS908        | <i>W303 MATa RDN1::ADE2 rif1Δ::NATMX4</i>                                         | 1E                  | (Shyian et al., 2016)     |
| YMS910        | <i>W303 MATa RDN1::ADE2 rif1Δ::NATMX4 rrm3Δ::KANMX6</i>                           | 1E                  | (Shyian et al., 2016)     |
| YMS1228       | <i>W303 MATa RDN1::ADE2 rif1Δ::NATMX4 tof1Δ::HPHMX4</i>                           | 1E                  | This study                |
| YMS1224       | <i>W303 MATa RDN1::ADE2 rrm3Δ::KANMX6 tof1Δ::HPHMX4</i>                           | 1E                  | This study                |
| YMS1226       | <i>W303 MATa RDN1::ADE2 rrm3Δ::KANMX6 rif1Δ::NATMX4 tof1Δ::HPHMX4</i>             | 1E                  | This study                |
| YMS912        | <i>W303 MATa RDN1::ADE2 rif1Δ::NATMX4 rrm3Δ::KANMX6 fob1Δ::URA3</i>               | 1E                  | (Shyian et al., 2016)     |
| YMS1227       | <i>W303 MATa RDN1::ADE2 rrm3Δ::KANMX6 rif1Δ::NATMX4 tof1Δ::HPHMX4 fob1Δ::URA3</i> | 1E                  | This study                |
| YMS1605-2     | <i>W303 MATalpha RDN1::ADE2</i>                                                   | 2A                  | This study                |
| YMS1606-2     | <i>W303 MATalpha RDN1::ADE2 tof1Δ::HPHMX4</i>                                     | 2A                  | This study                |
| YMS1607-2     | <i>W303 MATalpha RDN1::ADE2 top1Δ::NATMX4</i>                                     | 2A                  | This study                |
| YMS1608-2     | <i>W303 MATalpha RDN1::ADE2 top1Δ::NATMX4 tof1Δ::HPHMX4</i>                       | 2A                  | This study                |
| YMS1505       | <i>W303 MATa TOP1-13MYC::KANMX3</i>                                               | 2B, S2B, S2C        | This study                |
| YMS1506       | <i>W303 MATa TOP1-13MYC::KANMX3 Tof1-TAP::HIS3</i>                                | 2B, S2B             | This study                |
| YMS1507       | <i>W303 MATa TOP1-13MYC::KANMX3 Tof1-TAP::HIS3 mrc1Δ::HPHMX4</i>                  | 2B, S2B             | This study                |
| YMS1508       | <i>W303 MATa TOP1-13MYC::KANMX3 Tof1-TAP::HIS3 csm3Δ::HPHMX4</i>                  | 2B                  | This study                |
| YMS1512       | <i>W303 MATa TOP1-13MYC::KANMX3 Mrc1-TAP::HIS3</i>                                | 2B, S2B             | This study                |
| YMS1513       | <i>W303 MATa TOP1-13MYC::KANMX3 Mrc1-TAP::HIS3 tof1Δ::HPHMX4</i>                  | 2B, S2B             | This study                |
| YMS1510       | <i>W303 MATa TOP1-13MYC::KANMX3 Csm3-TAP::HIS3</i>                                | 2B, 5A, S2C         | This study                |
| YMS1511       | <i>W303 MATa TOP1-13MYC::KANMX3 Csm3-TAP::HIS3 tof1Δ::HPHMX4</i>                  | 2B, 5A              | This study                |
| YMS1539-5     | <i>W303 MATa RAD5+ bar1Δ Mcm4-3FLAG::KANMX TOP1-13MYC::HIS3MX4</i>                | 2C, 2D, S2D, S2E    | This study                |
| YMS1540-9     | <i>W303 MATa RAD5+ bar1Δ Mcm4-3FLAG::KANMX TOP1-</i>                              | 2C, 2D,             | This study                |

|            |                                                                                                          |                      |                       |
|------------|----------------------------------------------------------------------------------------------------------|----------------------|-----------------------|
|            | <i>13MYC::HIS3MX4 tof1Δ::LEU2</i>                                                                        | S2D, S2E             |                       |
| YMS1555-1  | <i>W303 MATa RAD5+ bar1Δ Mcm4-3FLAG::KANMX TOP1-13MYC::HIS3MX4 mrc1Δ::LEU2</i>                           | 2C, 2D, S2D          | This study            |
| YMS1542-19 | <i>W303 MATa RAD5+ bar1Δ Mcm4-3FLAG::KANMX TOP1-13MYC::HIS3MX4 tof1Δ::LEU2 rrm3Δ::HPHMX4</i>             | 2C, 2D, S2D          | This study            |
| YMS1538    | <i>W303 MATa RAD5+ bar1Δ TOP1-13MYC::HIS3MX4</i>                                                         | 2E                   | This study            |
| YMS1551-5  | <i>W303 MATa RAD5+ bar1Δ TOP1-13MYC::HIS3MX4 TOF1-3FLAG::KANMX</i>                                       | 2E, 2F, S2F, S2G     | This study            |
| YMS1552-6  | <i>W303 MATa RAD5+ bar1Δ TOP1-13MYC::HIS3MX4 tof1-Δ981-1238-3FLAG::KANMX</i>                             | 2E, 2F, S2F, S2G     | This study            |
| YMS1449    | <i>12geneΔ0HSR MATa</i>                                                                                  | 3A, S3A              | This study            |
| YMS1638-5  | <i>12geneΔ0HSR MATa TOF1-3FLAG::KANMX</i>                                                                | 3A, S3A              | This study            |
| YMS1561-1  | <i>12geneΔ0HSR MATa tof1Δ::LEU2</i>                                                                      | 3A, 5B, 5D, 5E, S5B  | This study            |
| YMS1639-4  | <i>12geneΔ0HSR MATa tof1-Δ981-1238-3FLAG::KANMX</i>                                                      | 3A, S3A              | This study            |
| YMS1563-1  | <i>12geneΔ0HSR MATa top1Δ::KANMX6</i>                                                                    | 3A, S3A, S5B         | This study            |
| YMS1646-8  | <i>W303 MATa RAD5+ bar1Δ MCM4-13MYC::HIS3MX6 rrm3Δ::HPHMX4 TOF1-3FLAG::KANMX</i>                         | 3A, 3B, S3A, 3B, S3C | This study            |
| YMS1647-12 | <i>W303 MATa RAD5+ bar1Δ MCM4-13MYC::HIS3MX6 rrm3Δ::HPHMX4 tof1-Δ981-1238-3FLAG::KANMX</i>               | 3A, 3B, S3A, S3C     | This study            |
| YMS1644-1  | <i>W303 MATa RAD5+ bar1Δ MCM4-13MYC::HIS3MX6 TOF1-3FLAG::KANMX</i>                                       | 3B, S3C              | This study            |
| YMS1645-4  | <i>W303 MATa RAD5+ bar1Δ MCM4-13MYC::HIS3MX6 tof1-Δ981-1238-3FLAG::KANMX</i>                             | 3B, S3C              | This study            |
| YMS1676-13 | <i>W303 MATa RAD5+ bar1Δ MCM4-13MYC::HIS3MX6 rrm3Δ::HPHMX4 TOF1-3FLAG::KANMX top1Δ::NATMX4</i>           | 3B, S3C              | This study            |
| YMS1677-15 | <i>W303 MATa RAD5+ bar1Δ MCM4-13MYC::HIS3MX6 rrm3Δ::HPHMX4 tof1-Δ981-1238-3FLAG::KANMX top1Δ::NATMX4</i> | 3B, S3C              | This study            |
| YMS1673-7  | <i>W303 MATa RAD5+ bar1Δ MCM4-13MYC::HIS3MX6 rrm3Δ::HPHMX4 tof1Δ::LEU2 top1Δ::NATMX4</i>                 | 3B, S3C              | This study            |
| YMS1457    | <i>W303 MATalpha top2-ts</i>                                                                             | 4A, 4B               | This study            |
| YMS1465    | <i>W303 MATa top1Δ::NATMX4 top2-ts</i>                                                                   | 4A, 4B               | This study            |
| YMS1637-1  | <i>W303 MATalpha top2-ts tof1-Δ981-1238-3FLAG::KANMX</i>                                                 | 4A, 4B               | This study            |
| YMS1692    | <i>W303 MATa top2-ts top1Δ::NATMX4 bar1Δ::LEU2</i>                                                       | 4C                   | This study            |
| YMS1689    | <i>W303 MATa top2-ts tof1-Δ981-1238-3FLAG::KANMX rif1::NATMX4 RDN1::ADE2 bar1Δ::LEU2</i>                 | 4C                   | This study            |
| YMS1640-7  | <i>W303 MATalpha TOP2-AID*-9myc::hphB URA3::TIR1 Csm3-TAP::HIS3 TOF1-3FLAG::KANMX</i>                    | 5A, S4G              | This study            |
| YMS1641-8  | <i>W303 MATalpha TOP2-AID*-9myc::hphB URA3::TIR1 Csm3-TAP::HIS3 tof1-Δ981-1238-3FLAG::KANMX</i>          | 5A, S4G              | This study            |
| YMS1559-1  | <i>12geneΔ0HSR MATa WT</i>                                                                               | 5B, 5D, 5E, S5B      | This study            |
| YMS1707-1  | <i>12geneΔ0HSR MATa TOF1-3FLAG::KANMX</i>                                                                | 5B, 5E               | This study            |
| YMS1708-1  | <i>12geneΔ0HSR MATa tof1-Δ981-1238-3FLAG::KANMX</i>                                                      | 5B, 5D, 5E           | This study            |
| YMS1712    | <i>W303 MATa rad9Δ::SpHIS5</i>                                                                           | 5B, 5C               | This study            |
| YMS1713    | <i>W303 MATa rad9Δ::SpHIS5 TOF1-3FLAG::KANMX</i>                                                         | 5B, 5C               | This study            |
| YMS1714    | <i>W303 MATa rad9Δ::SpHIS5 tof1-Δ981-1238-3FLAG::KANMX</i>                                               | 5B, 5C               | This study            |
| YMS1715    | <i>W303 MATa rad9Δ::SpHIS5 tof1Δ::KANMX4</i>                                                             | 5B, 5C               | This study            |
| YMS419-4   | <i>W303 MATa RAD5+ bar1Δ SLD3-13MYC::HIS3MX6</i>                                                         | 5C                   | (Shyian et al., 2016) |
| YMS493     | <i>W303 MATa RAD5+ bar1Δ SLD3-13MYC::HIS3MX6 sml1Δ::HPHMX4 mec1Δ::KANMX6</i>                             | 5C                   | (Shyian et al., 2016) |
| YMS1560-1  | <i>12geneΔ0HSR MATa mrc1Δ::LEU2</i>                                                                      | 5D, 5E, S5B          | This study            |
| YMS1709-1  | <i>12geneΔ0HSR MATa mrc1Δ::LEU2 TOF1-3FLAG::KANMX</i>                                                    | 5E                   | This study            |
| YMS1710-1  | <i>12geneΔ0HSR MATa mrc1Δ::LEU2 tof1-Δ981-1238-3FLAG::KANMX</i>                                          | 5D, 5E               | This study            |

|               |                                                                                |          |                       |
|---------------|--------------------------------------------------------------------------------|----------|-----------------------|
| YMS1711-1     | <i>12geneΔOHSR MATa mrc1Δ::LEU2 tof1Δ::LEU2</i>                                | 5D, 5E   | This study            |
| YMS1024-1     | <i>W303 MATa URA3::BrdU-Inc fob1Δ::KANMX6</i>                                  | S1B      | (Shyian et al., 2016) |
| YMS1609       | <i>BY MATa tof1Δ::KANMX</i>                                                    | S1B      | This study            |
| YMS598-2      | <i>W303 MAT alpha mrc1Δ::HPHMX4</i>                                            | S1B      | This study            |
| YMS1611       | <i>BY MATa ctf4Δ::KANMX</i>                                                    | S1B      | This study            |
| YMS1612       | <i>BY MATa chl1Δ::KANMX</i>                                                    | S1B      | This study            |
| YMS1613       | <i>BY MATa ctf18Δ::KANMX</i>                                                   | S1B      | This study            |
| YMS1403-14    | <i>W303 MATa OsTIR1::URA3 SMC1-AID*-9myc::hphB</i>                             | S1B      | This study            |
| YMS1614       | <i>BY MATa tof2Δ::KANMX</i>                                                    | S1C      | This study            |
| YMS1615       | <i>BY MATa lrs4Δ::KANMX</i>                                                    | S1C      | This study            |
| YMS1616       | <i>BY MATa nur1Δ::KANMX</i>                                                    | S1C      | This study            |
| YMS1617       | <i>BY MATa heh1Δ::KANMX</i>                                                    | S1C      | This study            |
| YMS1618       | <i>BY MATa heh2Δ::KANMX</i>                                                    | S1C      | This study            |
| YMS461-2      | <i>W303 MATa RAD5+ bar1Δ CDC45-13MYC::HIS3MX6</i>                              | S1D      | This study            |
| YMS1288-3     | <i>W303 MATa RAD5+ bar1Δ CDC45-13MYC::HIS3MX6 tof1Δ::LEU2</i>                  | S1D      | This study            |
| YMS1293 (4-1) | <i>W303 MATa RAD5+ bar1Δ CDC45-13MYC::HIS3MX6 rrm3Δ::HPHMX4</i>                | S1D      | This study            |
| YMS1298-7     | <i>W303 MATa RAD5+ bar1Δ CDC45-13MYC::HIS3MX6 rrm3Δ::HPHMX4 tof1Δ::LEU2</i>    | S1D      | This study            |
| YMS1264-E     | <i>W303 MATa RDN1::ADE2::URA3::TRP1 WT</i>                                     | S2A      | This study            |
| YMS465-1      | <i>W303 MATa mre11Δ::HPHMX4</i>                                                | 3C       | (Shyian et al., 2016) |
| YMS467-1      | <i>W303 MATa mre11Δ::HPHMX4 rif1Δ::NATMX4</i>                                  | 3C       | (Shyian et al., 2016) |
| YMS1703       | <i>W303 MATalpha mre11Δ::HPHMX4 rif1Δ::NATMX4 tof1-Δ981-1238-3FLAG::KANMX</i>  | 3C       | This study            |
| YMS1704       | <i>W303 MATalpha mre11Δ::HPHMX4 rif1Δ::NATMX4 tof1::KANMX6</i>                 | 3C       | This study            |
| YMS1481       | <i>W303 MATalpha Top1-MYC::KANMX3</i>                                          | S4A      | This study            |
| YMS1482-3     | <i>W303 MATalpha Top1-MYC::KANMX3 TOF1-TAP::HIS3</i>                           | S4A      | This study            |
| YMS1483-8     | <i>W303 MATalpha Top1-MYC::KANMX3 CSM3-TAP::HIS3</i>                           | S4A      | This study            |
| YMS1485       | <i>W303 MATalpha TOP2-3FLAG::KANMX</i>                                         | S4A      | This study            |
| YMS1486-5     | <i>W303 MATalpha TOP2-3FLAG::KANMX TOF1-TAP::HIS3</i>                          | S4A      | This study            |
| YMS1487-9     | <i>W303 MATalpha TOP2-3FLAG::KANMX CSM3-TAP::HIS3</i>                          | S4A      | This study            |
| YMS1496.      | <i>W303 MATa RAD5+ bar1Δ TOP2-AID*-9myc::hphB</i>                              | S4B      | This study            |
| YMS1553-9     | <i>W303 MATa RAD5+ bar1Δ TOP2-AID*-9myc::hphB TOF1-3FLAG::KANMX</i>            | S4B      | This study            |
| YMS1554-9     | <i>W303 MATa RAD5+ bar1Δ TOP2-AID*-9myc::hphB tof1-Δ981-1238-3FLAG::KANMX</i>  | S4B      | This study            |
| YDS3          | <i>W303 MATalpha WT</i>                                                        | S4C      | Lab collection        |
| YMS1405       | <i>W303 MATalpha OsTIR1::URA3 tof1Δ::LEU2</i>                                  | S4C      | This study            |
| BEN3          | <i>W303 MATa top1Δ::NATMX4</i>                                                 | S4C      | This study            |
| BEN16         | <i>W303 MATa top2-ts</i>                                                       | S4C      | This study            |
| BEN10         | <i>W303 MATa top2-ts top1Δ::NATMX4</i>                                         | S4C      | This study            |
| BEN240        | <i>MATa OsTIR1::URA3 HIS3+ ADE2+ TOP1-AID*-9myc::hphB</i>                      | S4D, S4F | This study            |
| BEN237        | <i>MATa OsTIR1::URA3 HIS3+ ADE2+ TOP2-AID*-9myc::hphB</i>                      | S4D      | This study            |
| BEN250        | <i>MATa OsTIR1::URA3 HIS3+ ADE2+ TOP3-AID*-9myc::hphB</i>                      | S4D      | This study            |
| BEN242        | <i>MATa OsTIR1::URA3 HIS3+ ADE2+ TOP2-AID*-9myc::hphB TOPI-aid(kanMX)</i>      | S4D      | This study            |
| YMS1470       | <i>MATa OsTIR1::URA3 HIS3+ ADE2+ TOP2-AID*-9myc::hphB TOP3-AID*-9myc::hphB</i> | S4D      | This study            |
| YMS1477       | <i>MATa OsTIR1::URA3 HIS3+ ADE2+ TOP3-AID*-9myc::hphB TOPI-aid(kanMX)</i>      | S4D      | This study            |
| YMS1687       | <i>W303 MATa top2-ts bar1Δ::LEU2</i>                                           | S4E      | This study            |
| YMS1691       | <i>W303 MATa top2-ts bar1Δ::LEU2 tof1Δ::HPHMX4</i>                             | S4E      | This study            |
| YMS1459       | <i>MATalpha OsTIR1::URA3 TOPI-aid(kanMX) TOP2-AID*-9myc::hphB</i>              | S4F      | This study            |



|            |                                                                                                                 |     |            |
|------------|-----------------------------------------------------------------------------------------------------------------|-----|------------|
| YMS1402-40 | <i>W303 MATa OsTIR1::URA3 TOF1-AID*-9myc::hphB</i>                                                              | S4F | This study |
| YMS1635    | <i>W303 MATalpha TOP2-AID*-9myc::hphB OsTIR1::URA3 Csm3-TAP::HIS3 top1Δ::NATMX4</i>                             | S4G | This study |
| YMS1643-11 | <i>W303 MATalpha TOP2-AID*-9myc::hphB OsTIR1::URA3 Csm3-TAP::HIS3 tof1-Δ981-1238-3FLAG::KANMX top1Δ::NATMX4</i> | S4G | This study |
| BEN151     | <i>W303 MATa tor1-1 fpr1Δ::NAT RPL13A-2XFKB12::TRP1 top1Δ::HISMX6 TOP2-FRB::KANMX6</i>                          | S4H | This study |
| YMS1460    | <i>MATa OsTIR1::URA3 TOP1-aid(kanMX) TOP2-AID*-9myc::hphB</i>                                                   | S4H | This study |
| YMS1467    | <i>W303 MATalpha OsTIR1::URA3 TOP1-aid(kanMX) TOP2-AID*-9myc::hphB rad53-K227A::KAN</i>                         | S4H | This study |
| YMS1468    | <i>MATa OsTIR1::URA3 TOP1-aid(kanMX) TOP2-AID*-9myc::hphB rad9Δ::SpHIS5</i>                                     | S4H | This study |
| YMS1559-2  | <i>I2geneΔ0HSR MATalpha WT</i>                                                                                  | S5A | This study |
| YMS1560-2  | <i>I2geneΔ0HSR MATalpha mrc1Δ::LEU2</i>                                                                         | S5A | This study |
| YMS1561-2  | <i>I2geneΔ0HSR MATalpha tof1Δ::LEU2</i>                                                                         | S5A | This study |
| YMS1562-2  | <i>I2geneΔ0HSR MATalpha csm3Δ::LEU2</i>                                                                         | S5A | This study |
| YMS1563-2  | <i>I2geneΔ0HSR MATalpha top1Δ::KANMX6</i>                                                                       | S5A | This study |
| YMS1562-1  | <i>I2geneΔ0HSR MATa csm3Δ::LEU2</i>                                                                             | S5B | This study |
| YMS1564-1  | <i>I2geneΔ0HSR MATa top1Δ::KANMX6 mrc1Δ::LEU2</i>                                                               | S5B | This study |
| YMS1565-1  | <i>I2geneΔ0HSR MATa top1Δ::KANMX6 tof1Δ::LEU2</i>                                                               | S5B | This study |
| YMS1566-1  | <i>I2geneΔ0HSR MATa top1Δ::KANMX6 csm3Δ::LEU2</i>                                                               | S5B | This study |
